# Supplementary material for: Future-Oriented Electrode Achieved by in-situ Generated Tetrahydrofuran-Based Binder
Source: Research Square preprint supplement (doi:10.21203/rs.3.rs-8356221/v1), 2026-01-07
Supplement: Supplementary file 1 [file 701e8faef224681cce42a0ec.docx]

**Supplementary Information**

Future-Oriented Electrode Achieved by *in-situ* Generated Tetrahydrofuran-Based Binder

Nanyu Chen1,3, Wei Wu1,3, Jiafeng Ruan1,3, Chenrui Li1, Saihui Duan1, Jiayun Zhang1, Yanzhou Zhu1, Xiayun Huang1, Fang Fang1,2, Dalin Sun1,2, Yun Song1,2,*

1College of Smart Materials and Future Energy, Fudan University, Shanghai 200433, P. R. China

2The State Key Laboratory of Molecular Engineering of Polymers and Department of Macromolecular Science, Fudan University, Shanghai 200438, P. R. China.

3These authors contributed equally: Nanyu Chen, Wei Wu, Jiafeng Ruan.

*Corresponding author. E-mail address: songyun@fudan.edu.cn


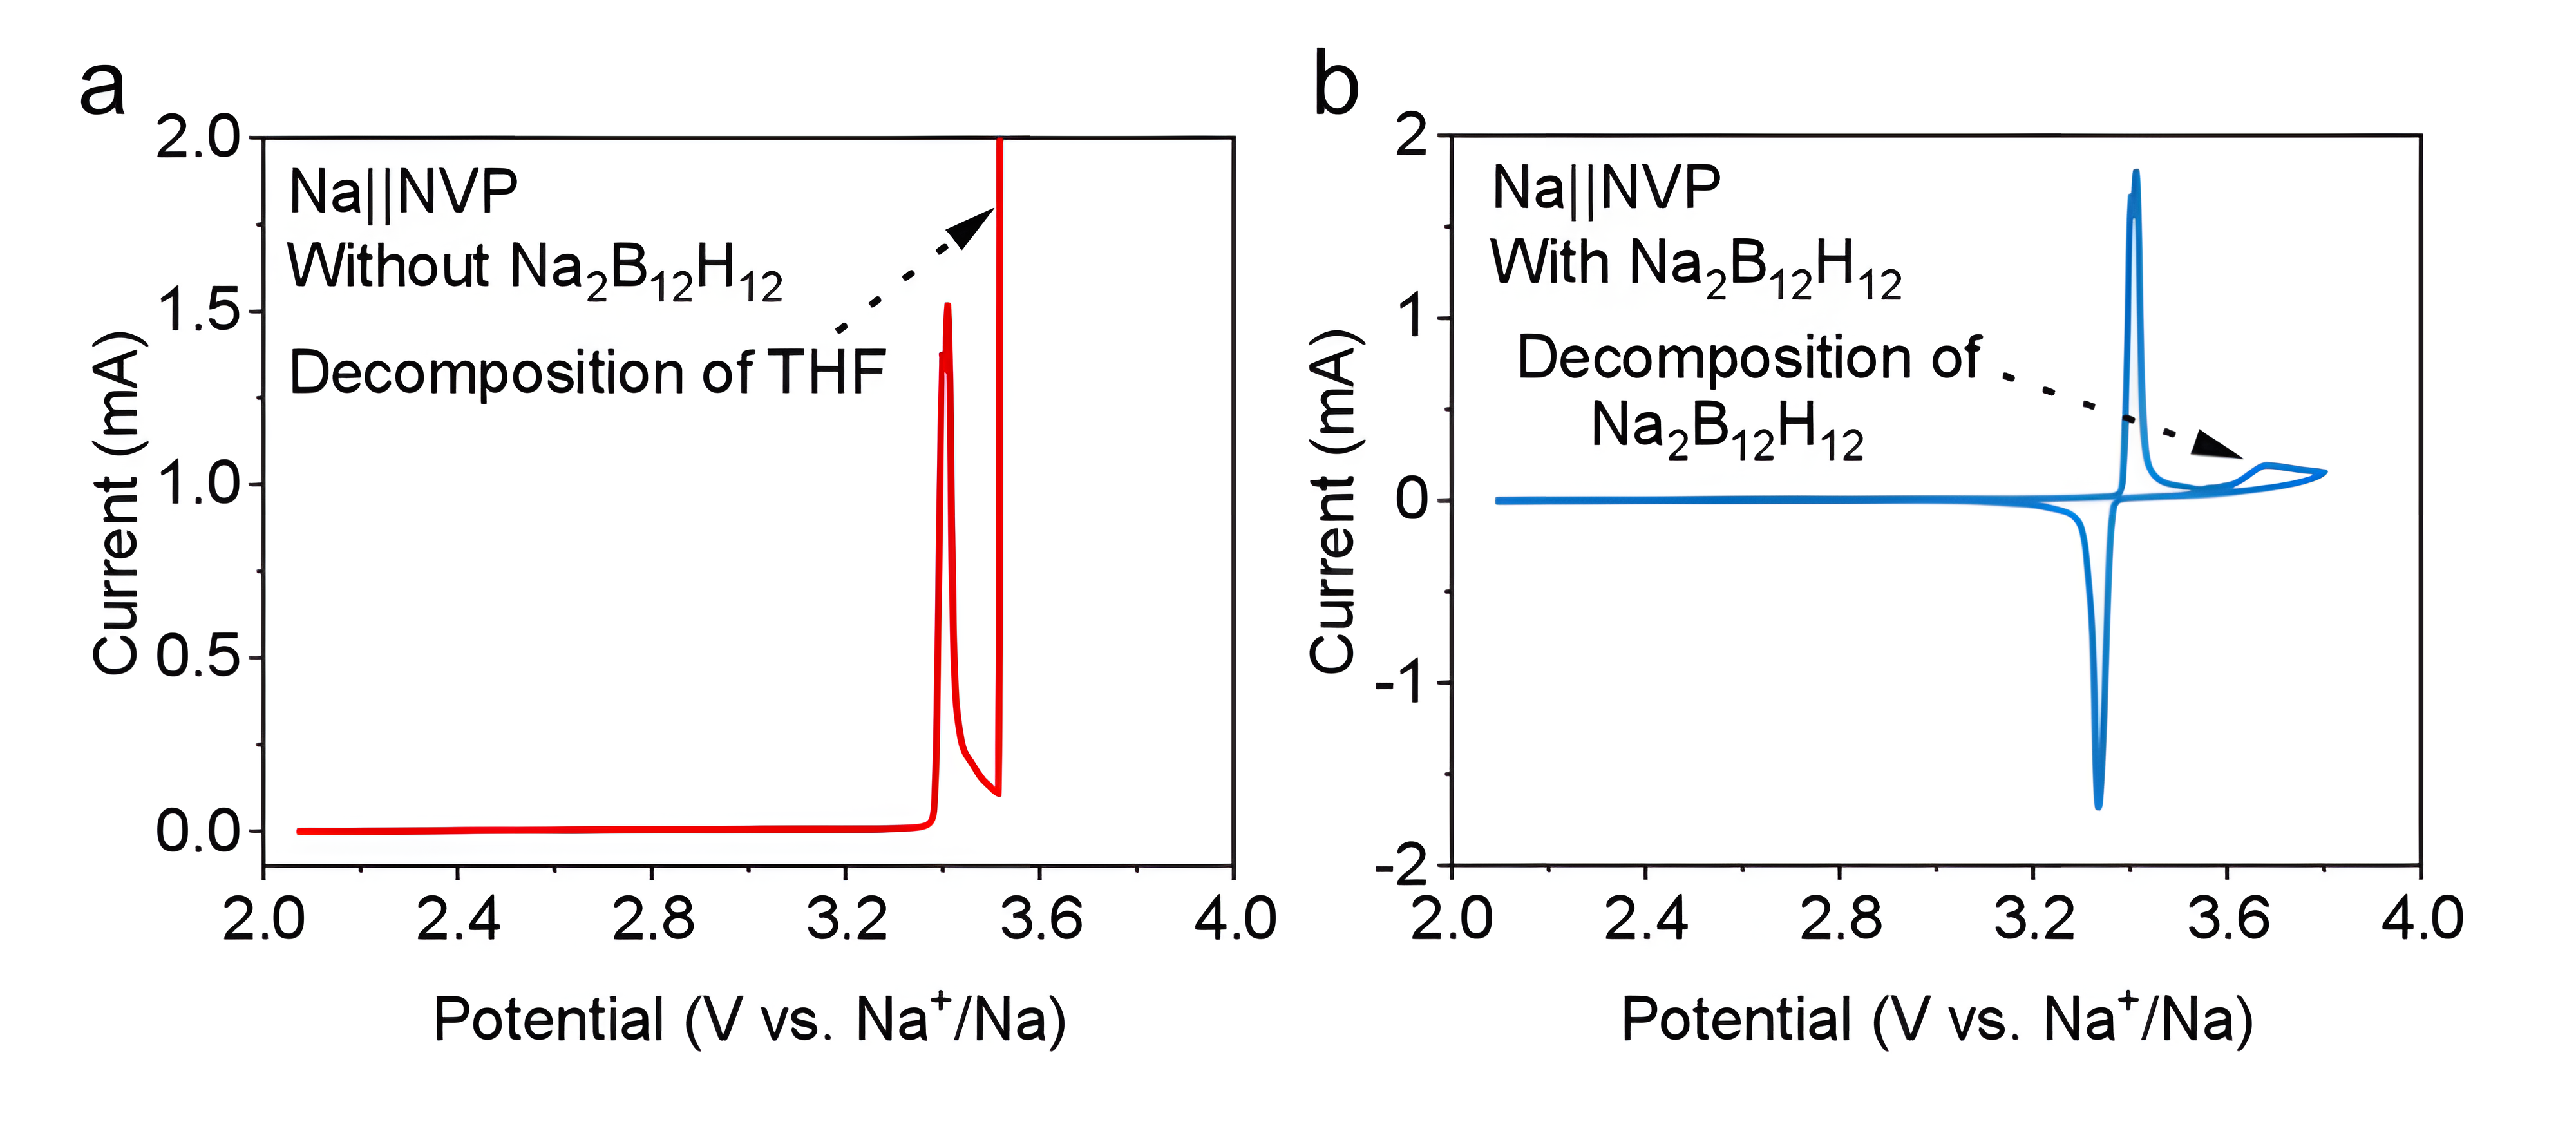


**Figure S1.** **a**, CV curve of Na||NVP@Al in NaPF6-THF electrolyte. **b**, CV curve of Na||NVP@Al in NaPF6-THF-Na2B12H12 electrolyte.


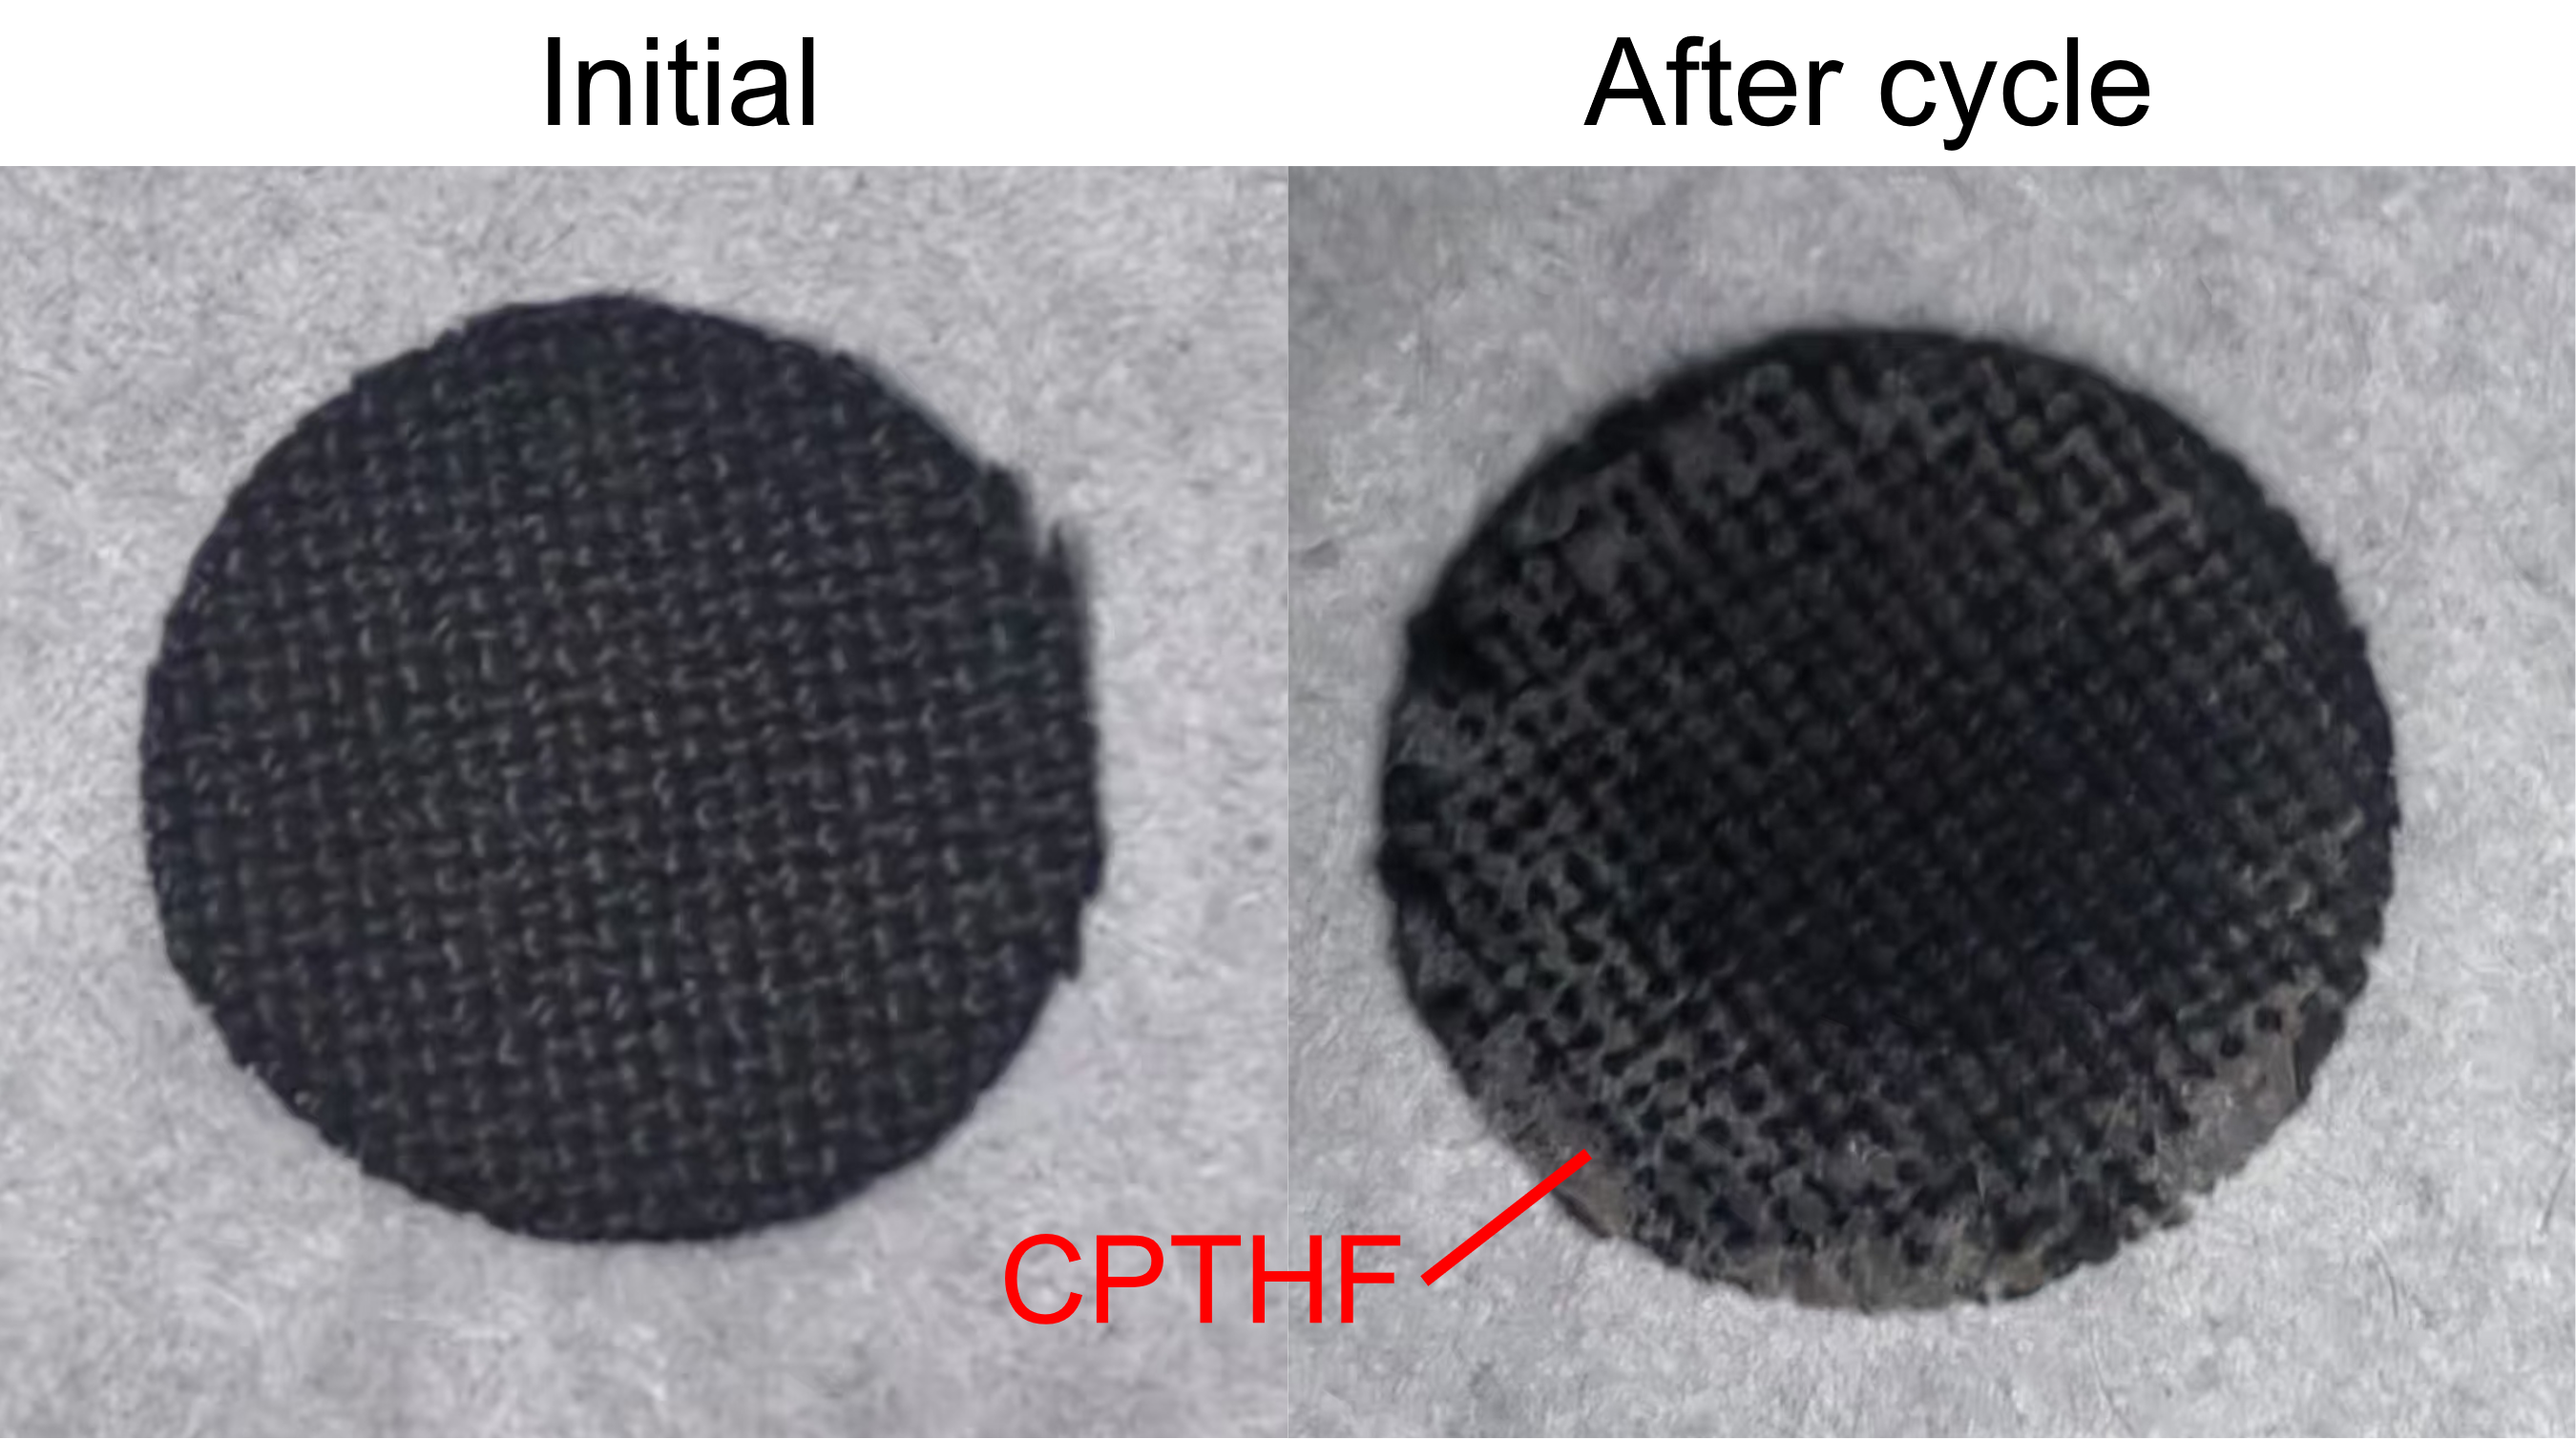


**Figure S2.** Optical images of NVP@CC and CPTHF@NVP@CC electrodes.


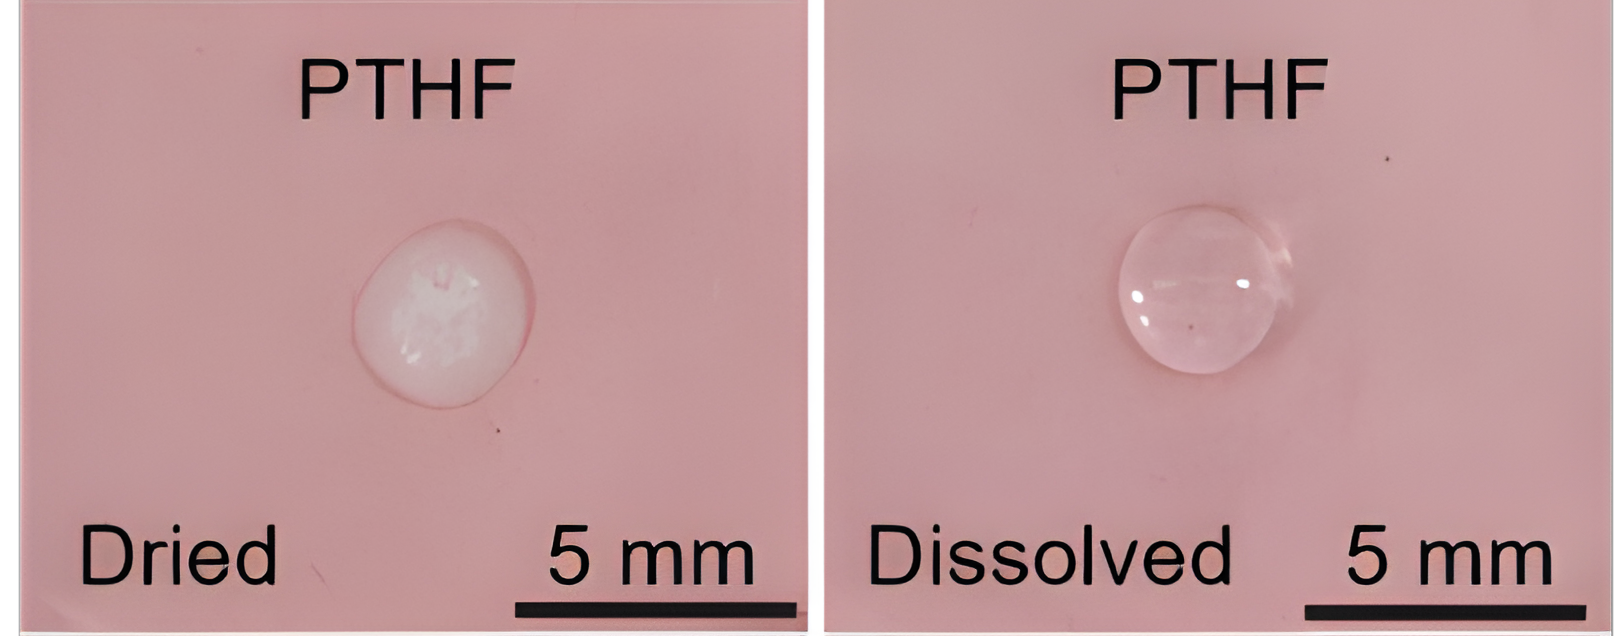


**Figure S3.** Optical images of dried/dissolved PTHF.


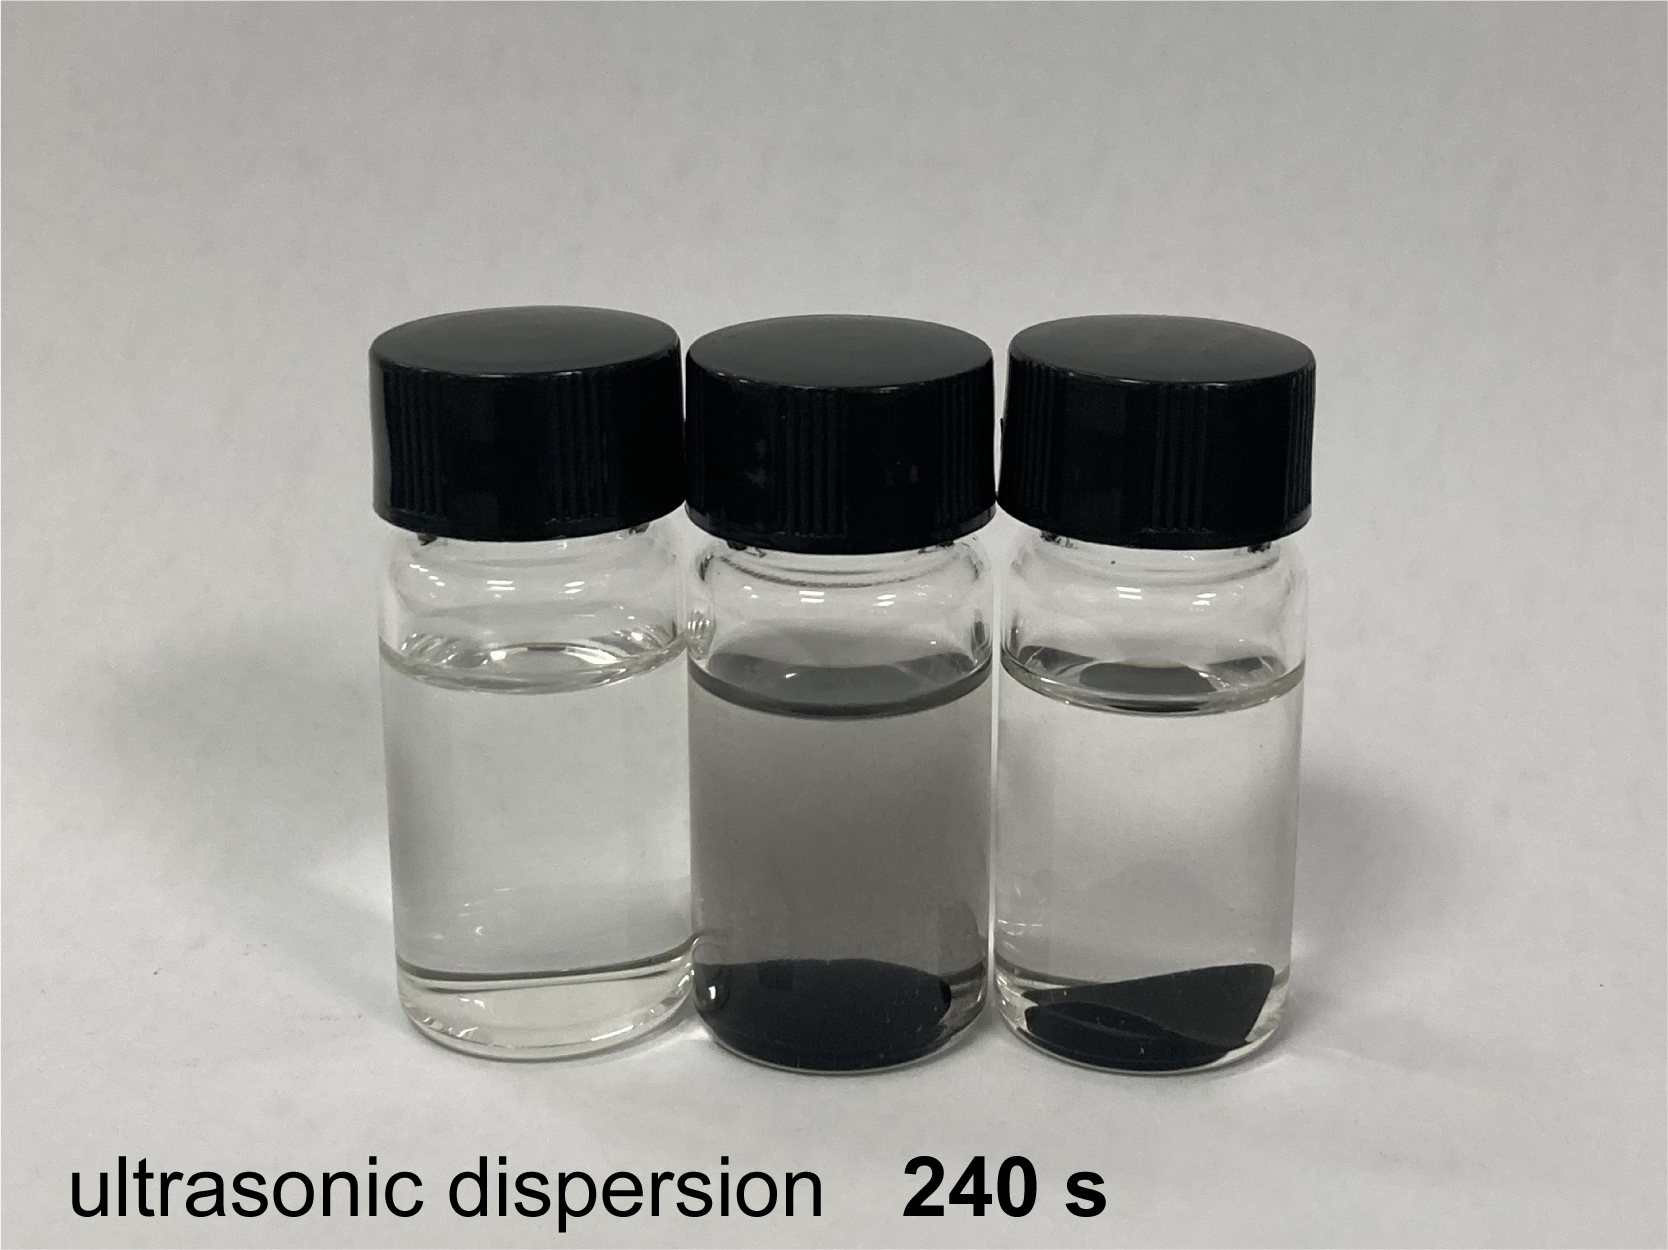


**Figure S4.** Optical image of THF (left), cycled NVP@Al using NaPF6-THF immersed in THF (middle) and cycled NVP@Al using NaPF6-THF-Na2B12H12 immersed in THF (right), which ultrasonic treated for 240 s.


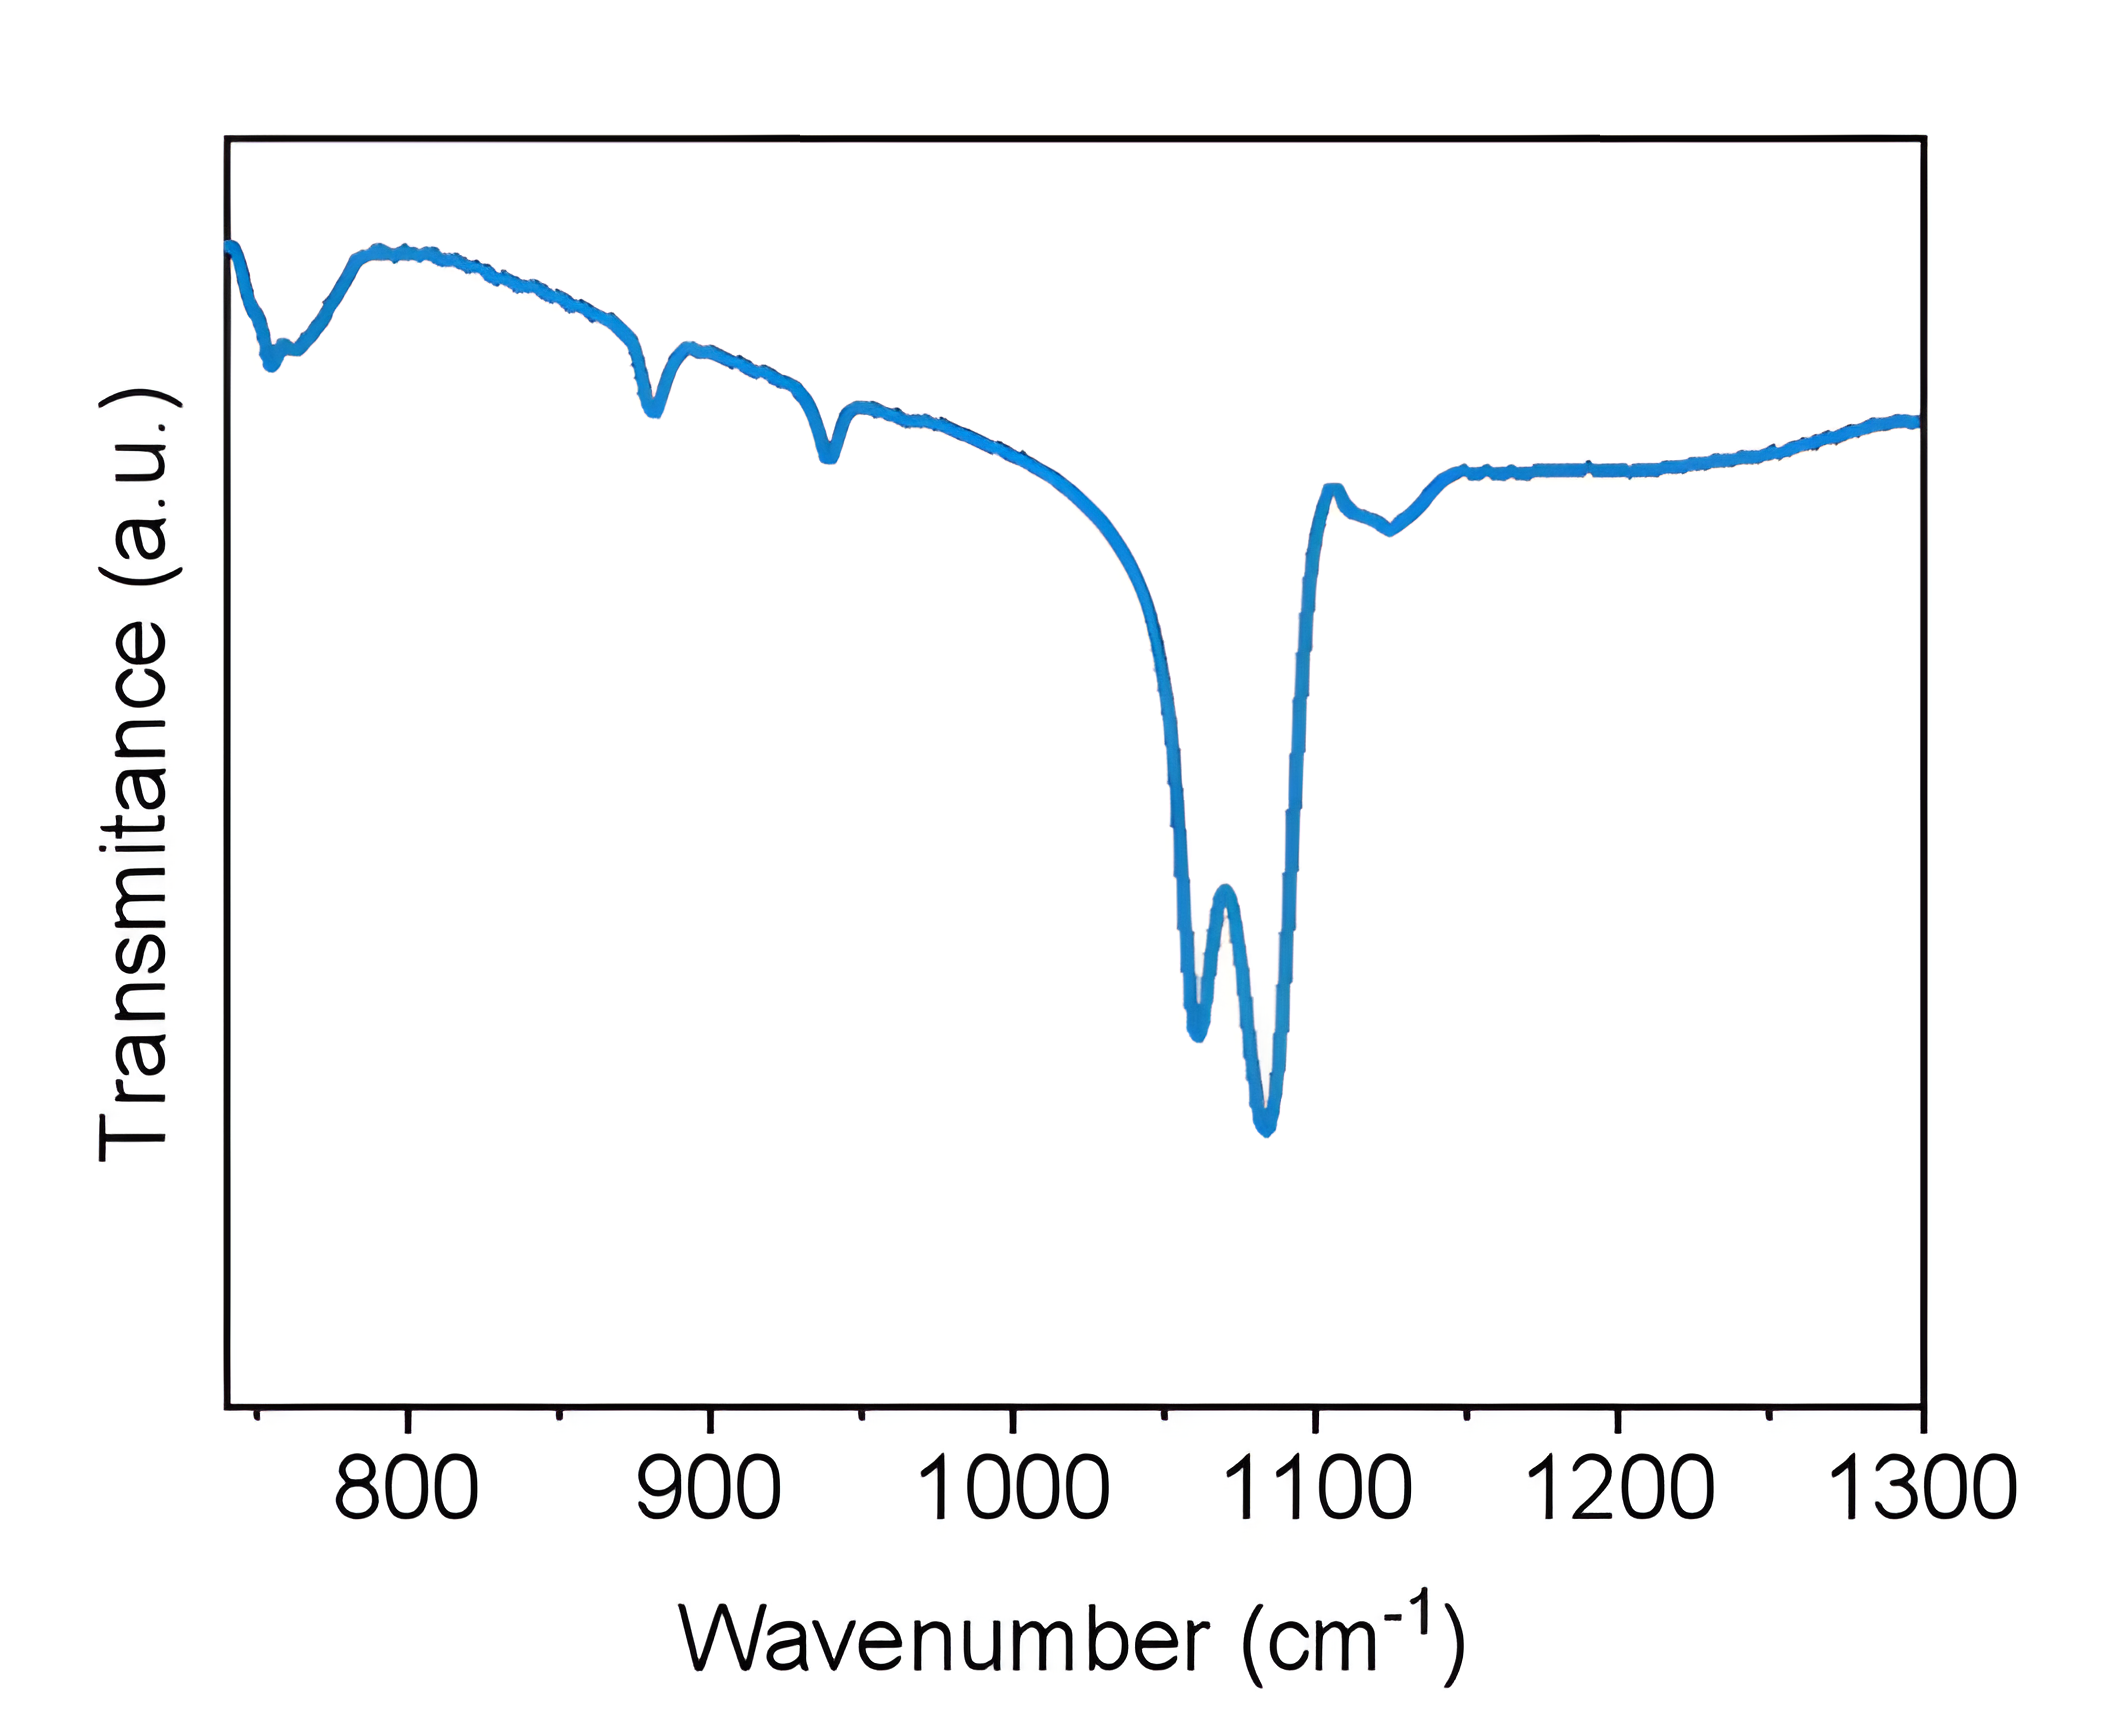


**Figure S5.** FT-IR spectrum of Na2B12H12.


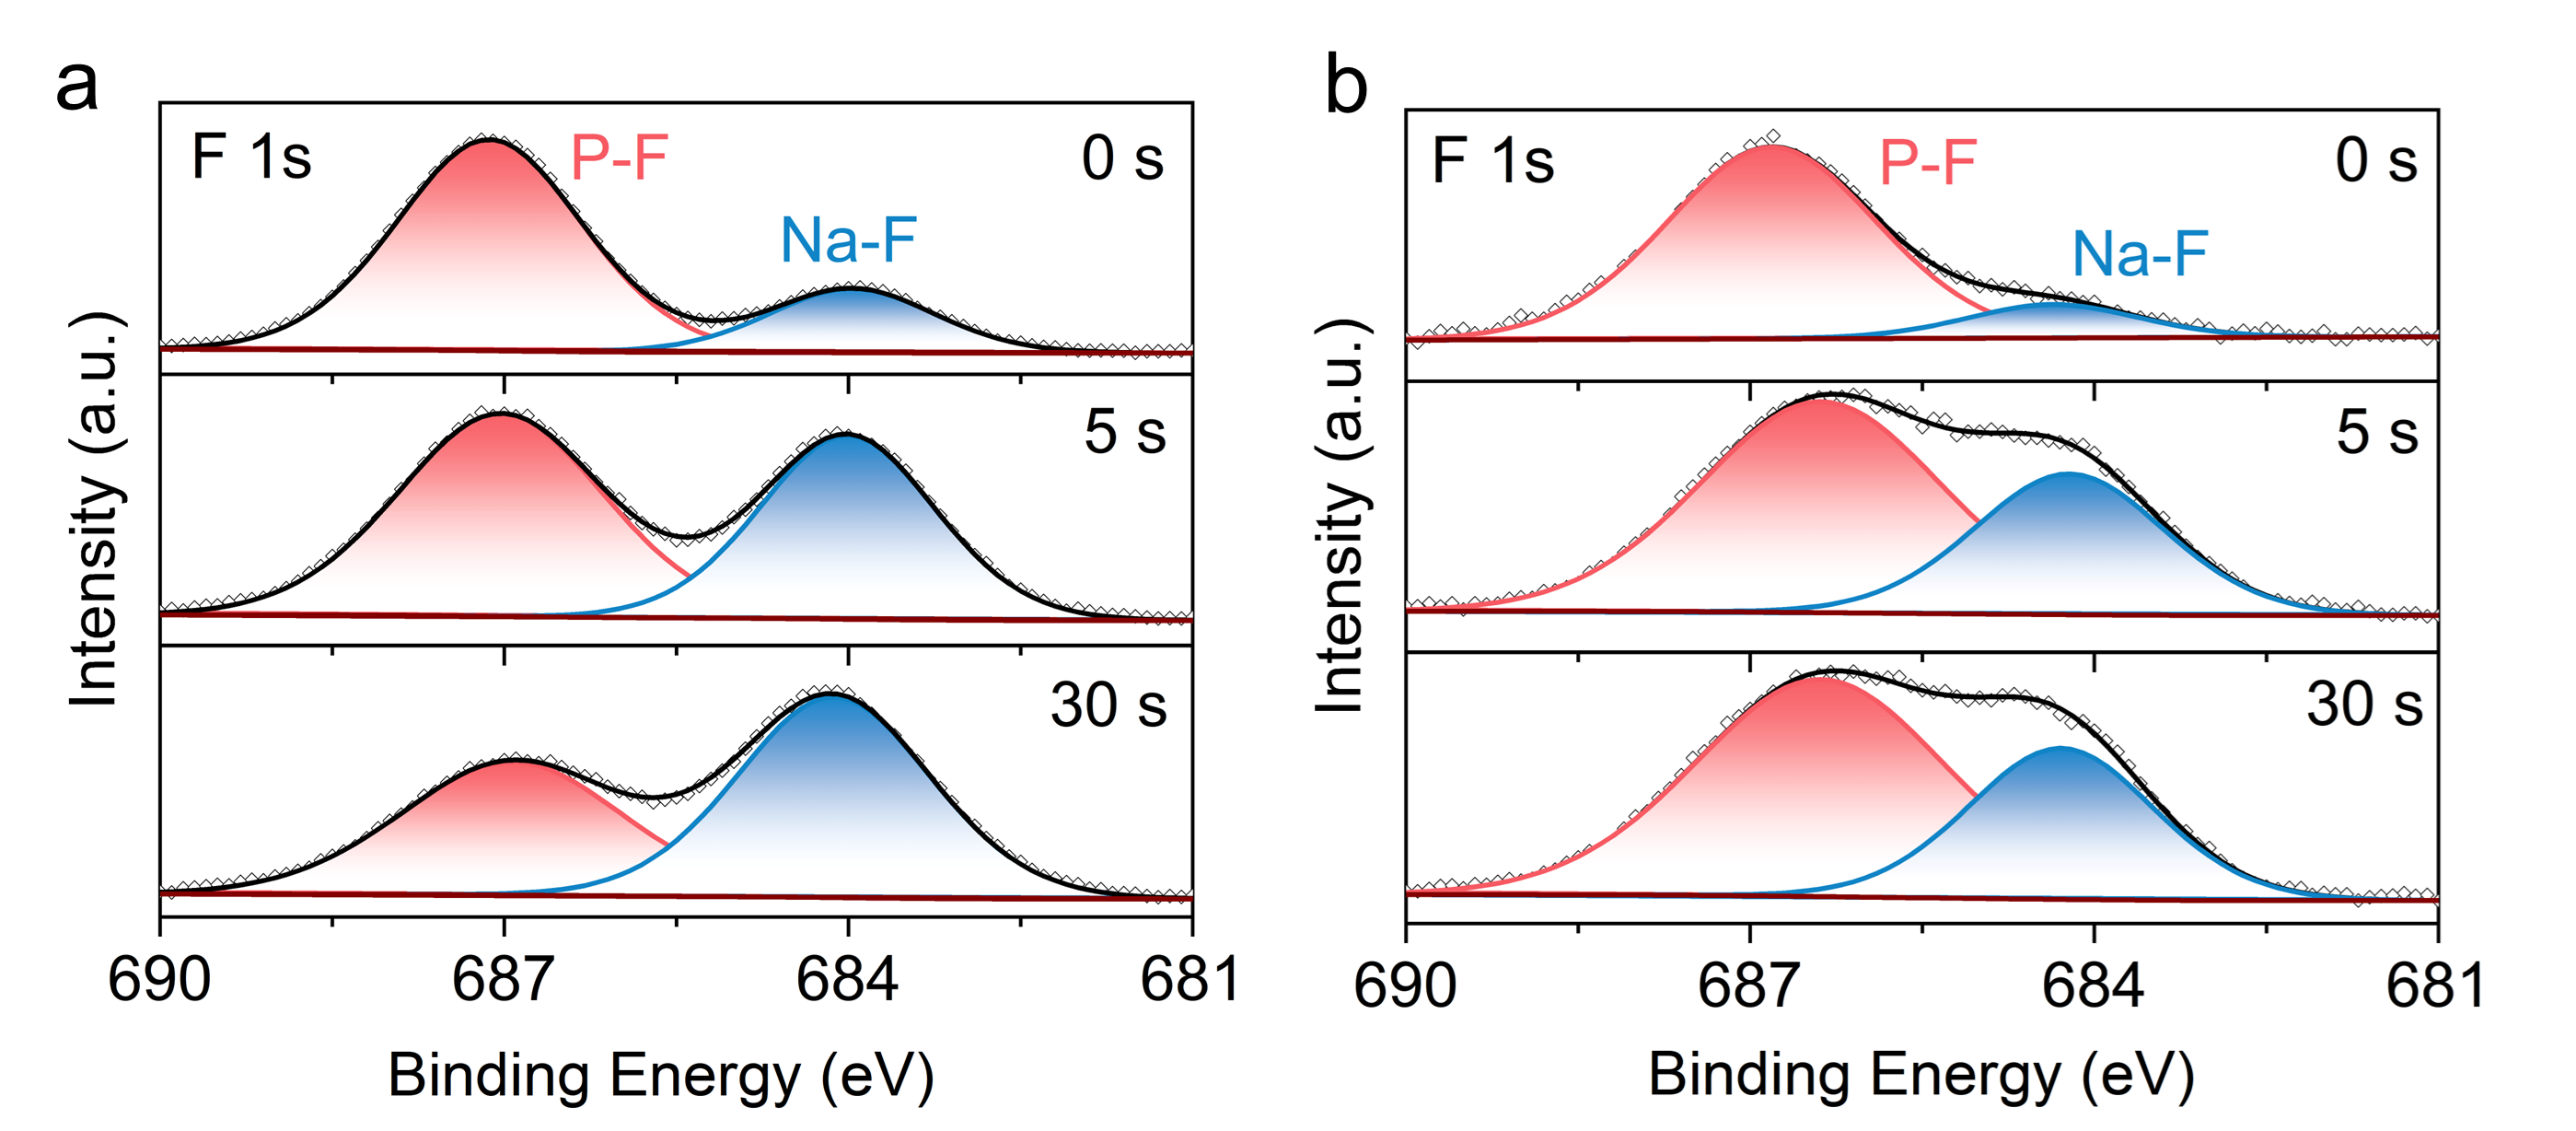


**Figure S6.** **a,b** F 1*s* XPS spectra of cycled NVP@Al using (a) NaPF6-THF and (b) NaPF6-THF-Na2B12H12 electrolytes.


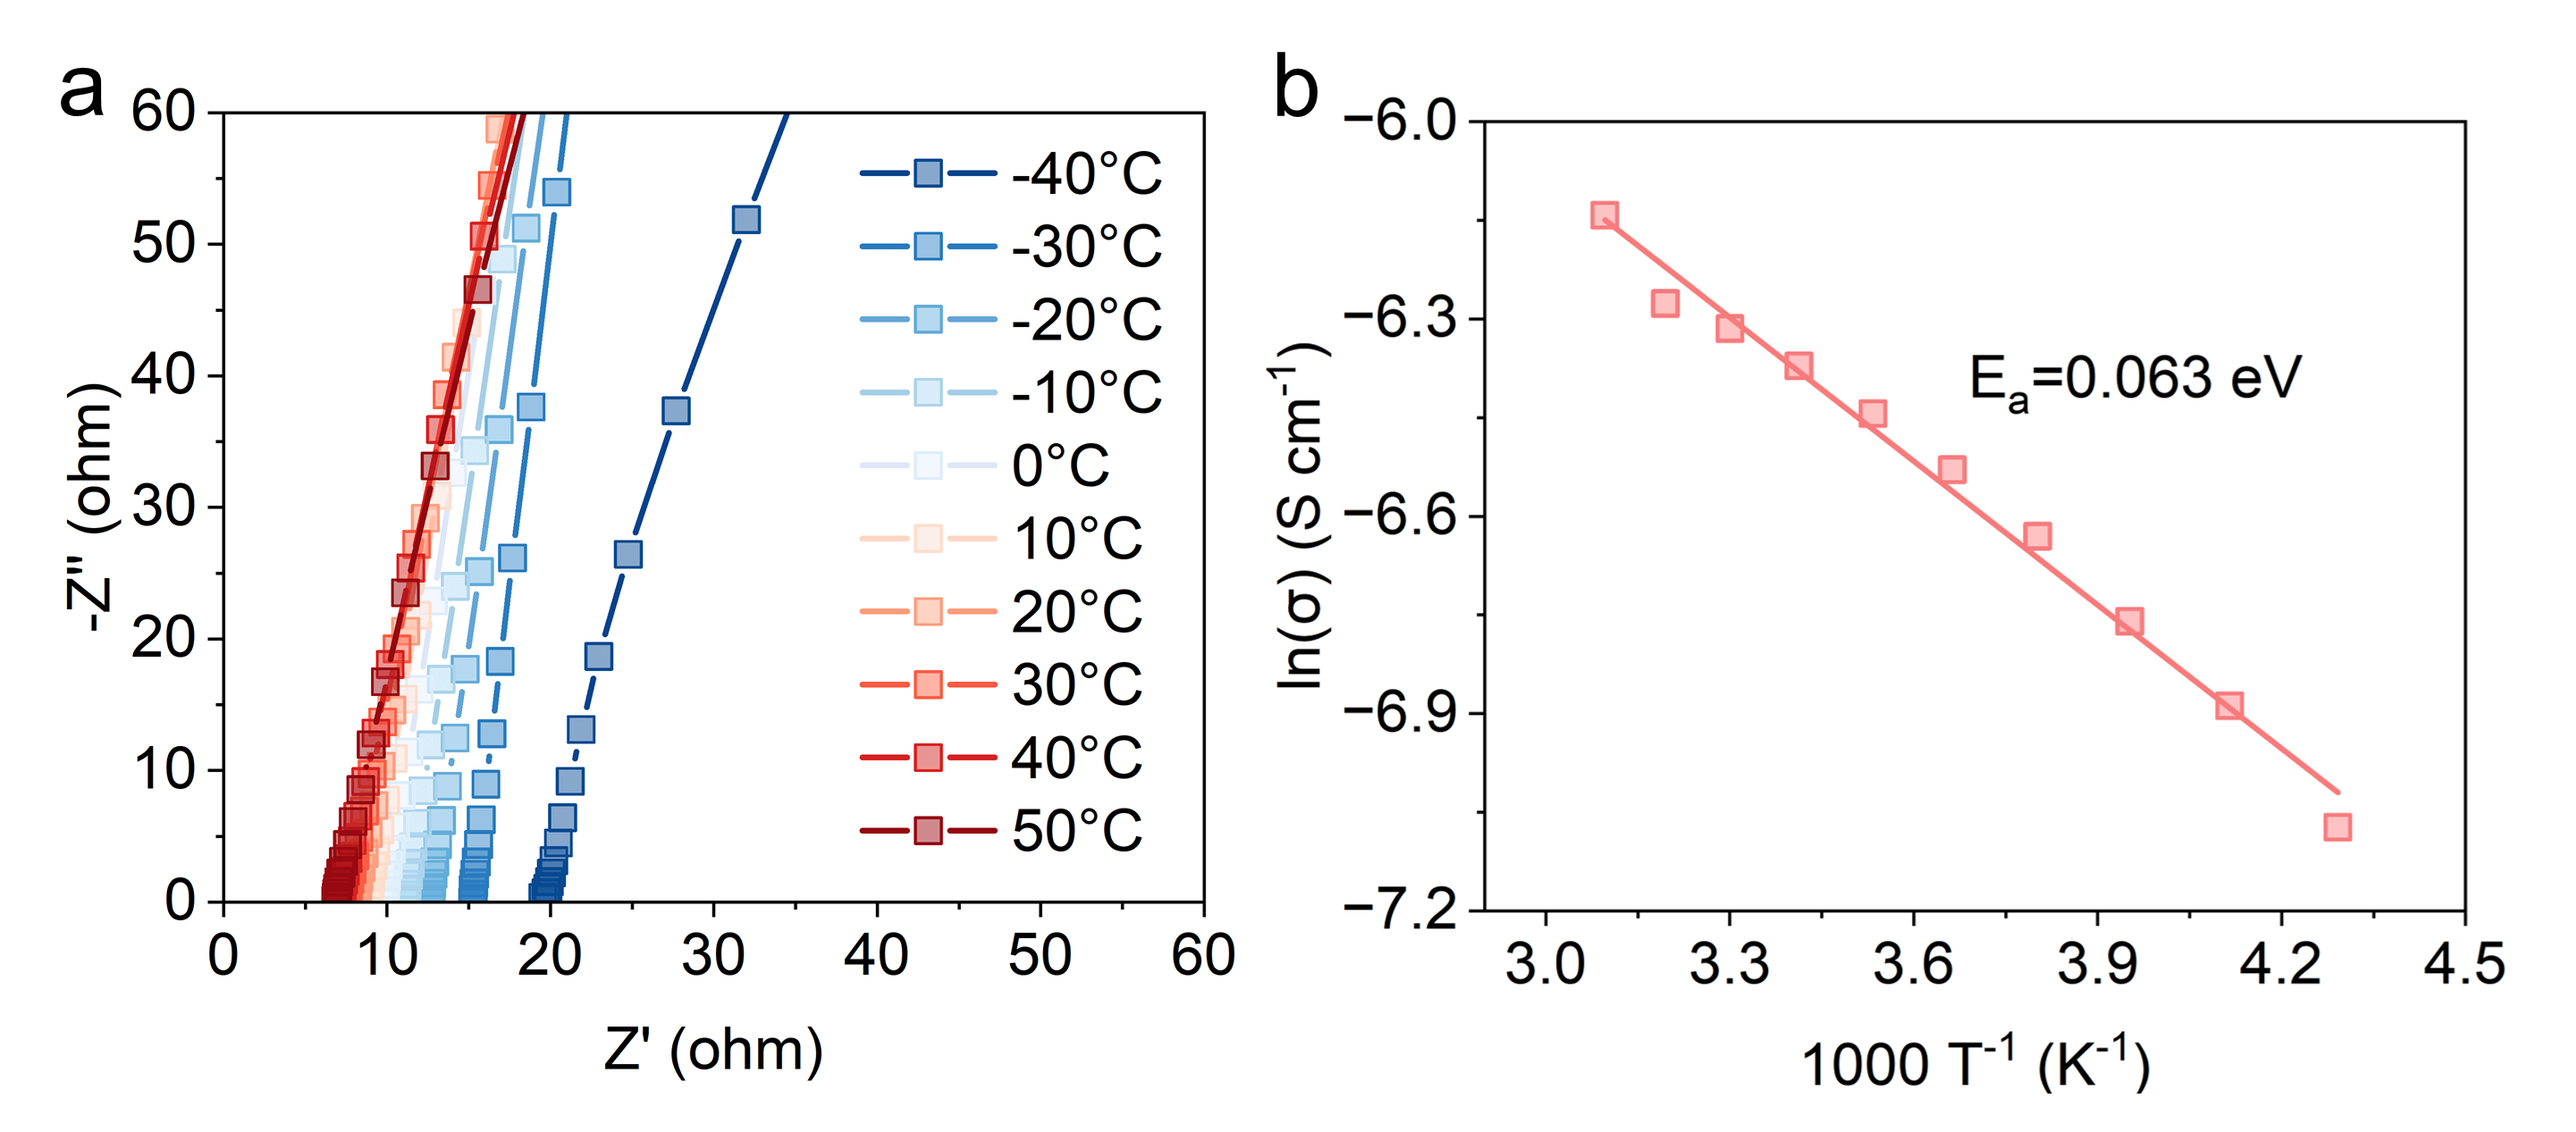


**Figure S7.** **a**,Variable-temperature Nyquist plots of CPTHF. **b**, Arrhenius plots of the ionic conductivity of CPTHF.


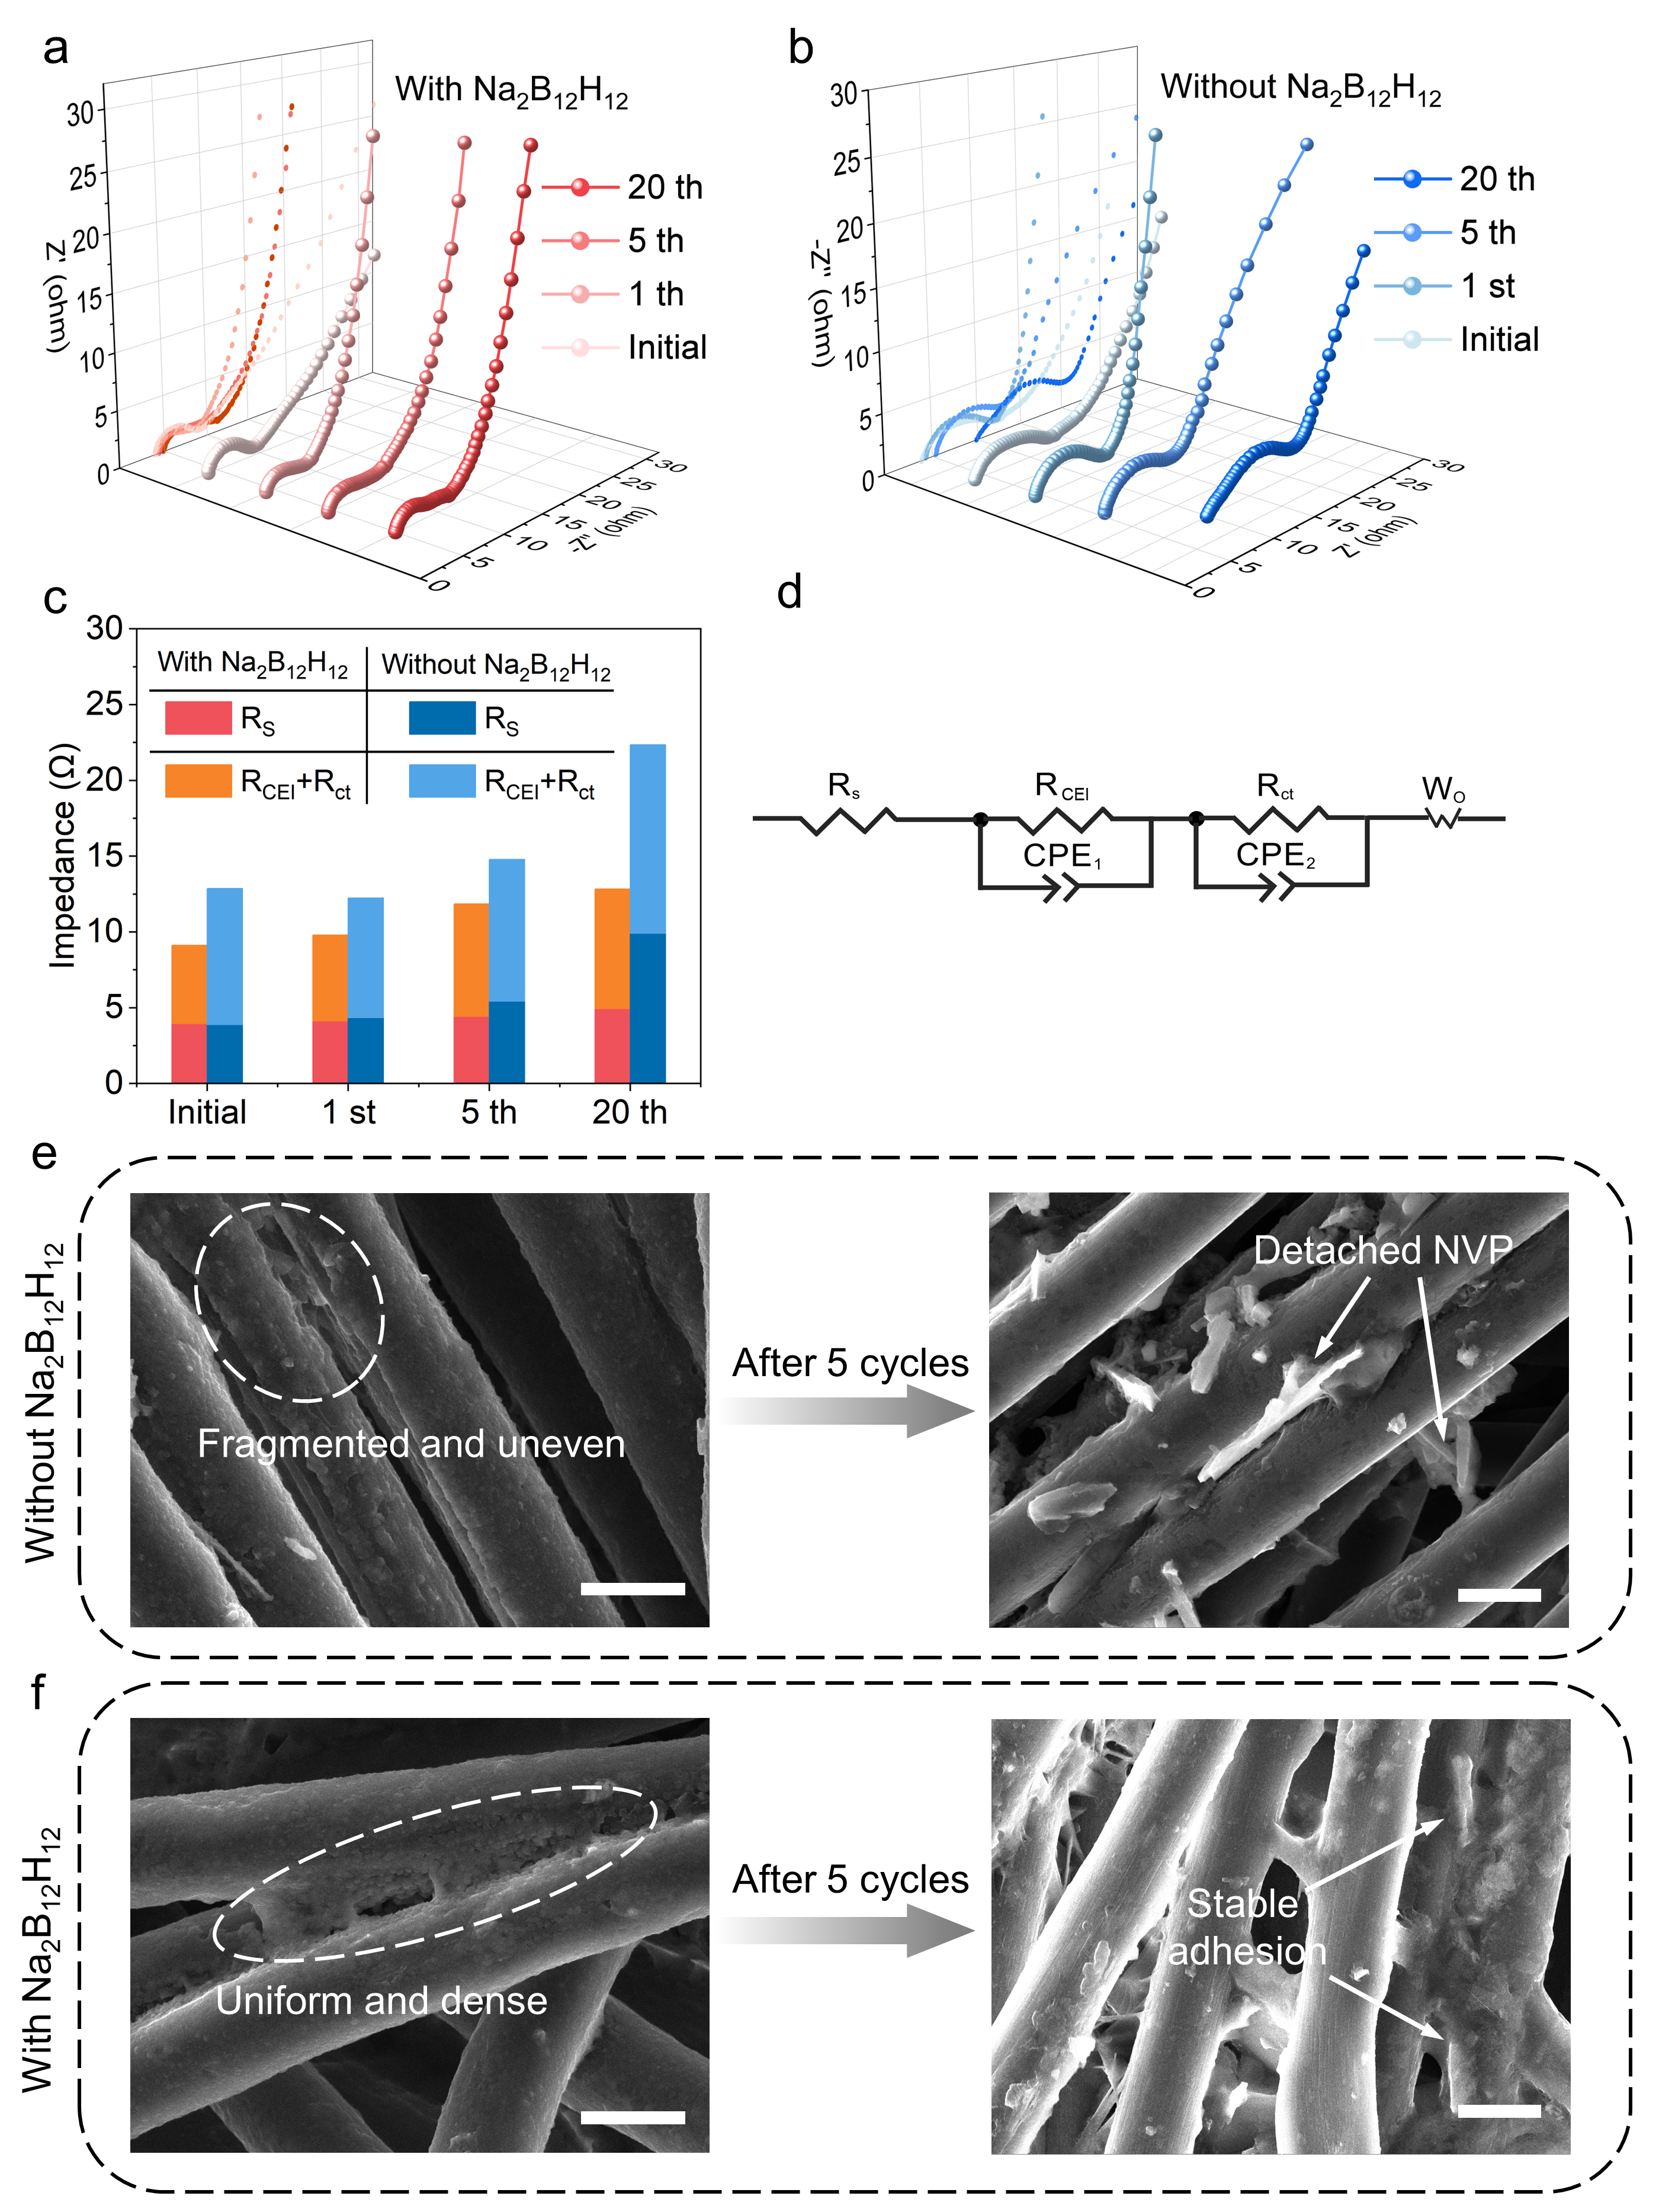


**Figure S8.** **a,b** Nyquist plots of NVP@CC in (a) NaPF6-THF and (b) NaPF6-THF-Na2B12H12 at 25 °C. **c**, Corresponding profile of RS and RCEI. **d**, Equivalent circuit model used for fitting. **e**, SEM images of NVP@CC and NVP@CC cycled in NaPF6-THF. **f**, SEM images of pristine NVP@CC and NVP@CC cycled in NaPF6-THF-Na2B12H12. The scale bar is 10 μm.


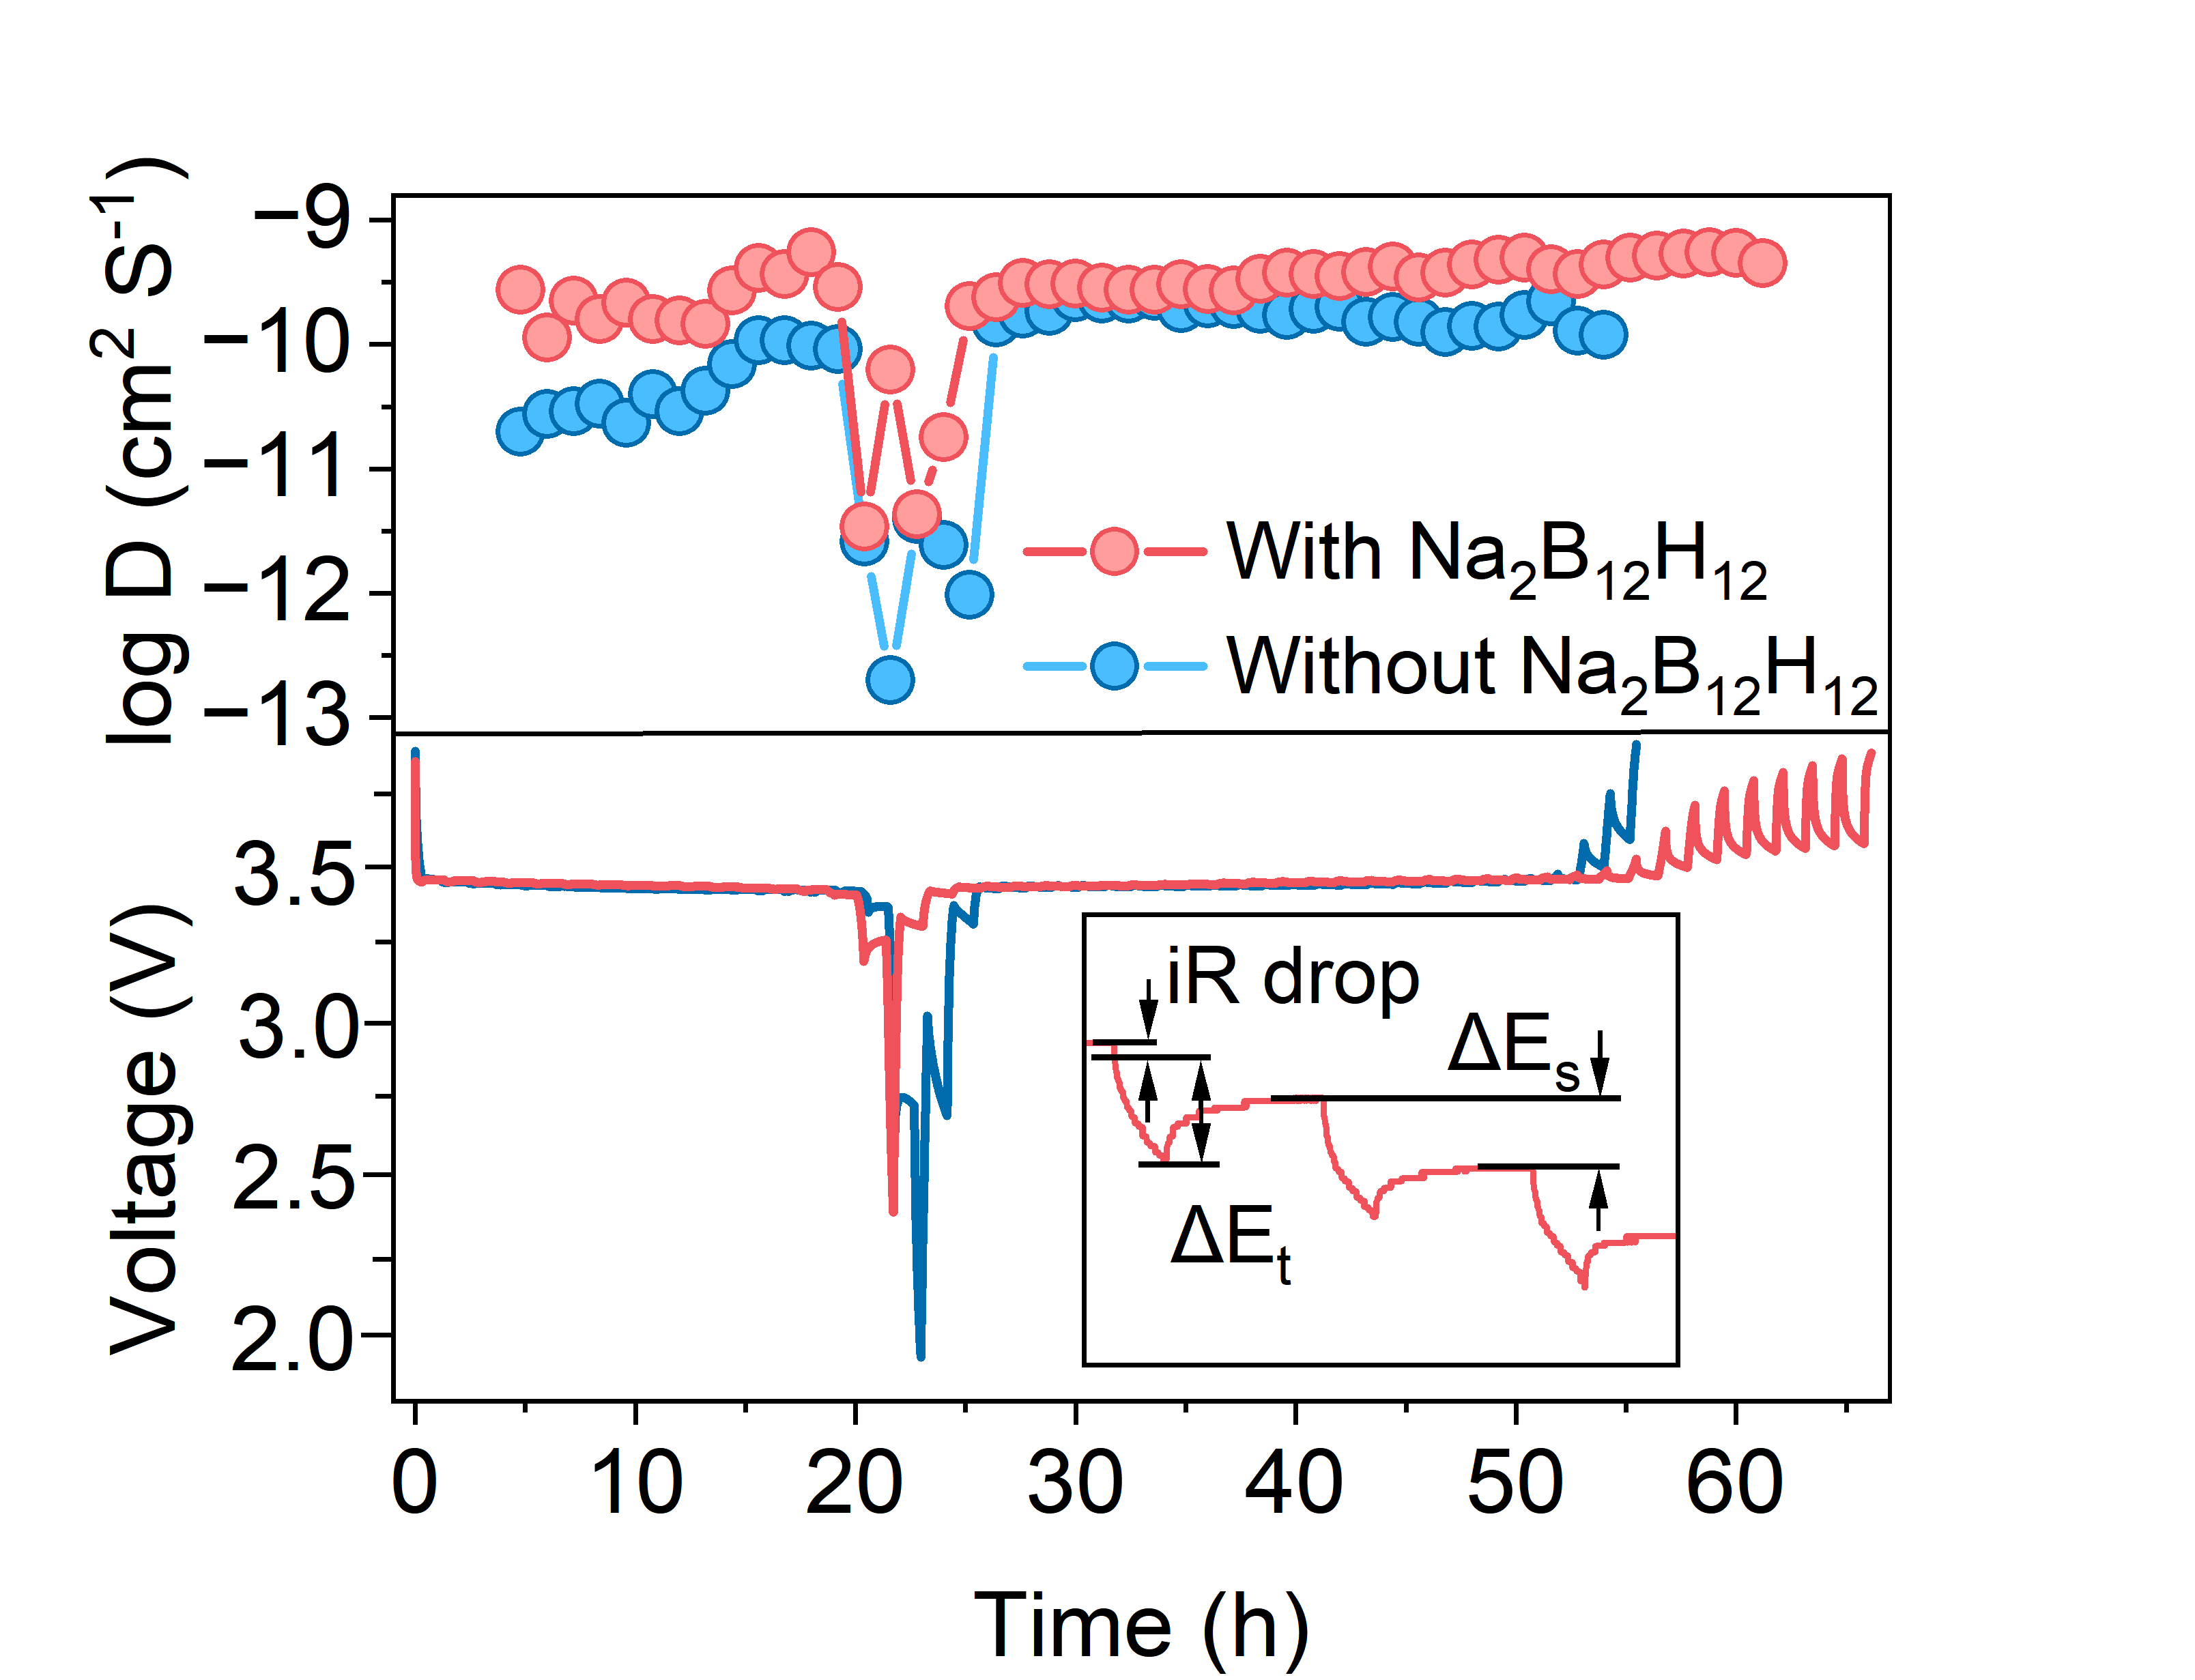


**Figure S9.** GITT curves of NaPF6-THF and NaPF6-THF-Na2B12H12, together with comparison of Na+ diffusion coefficients.


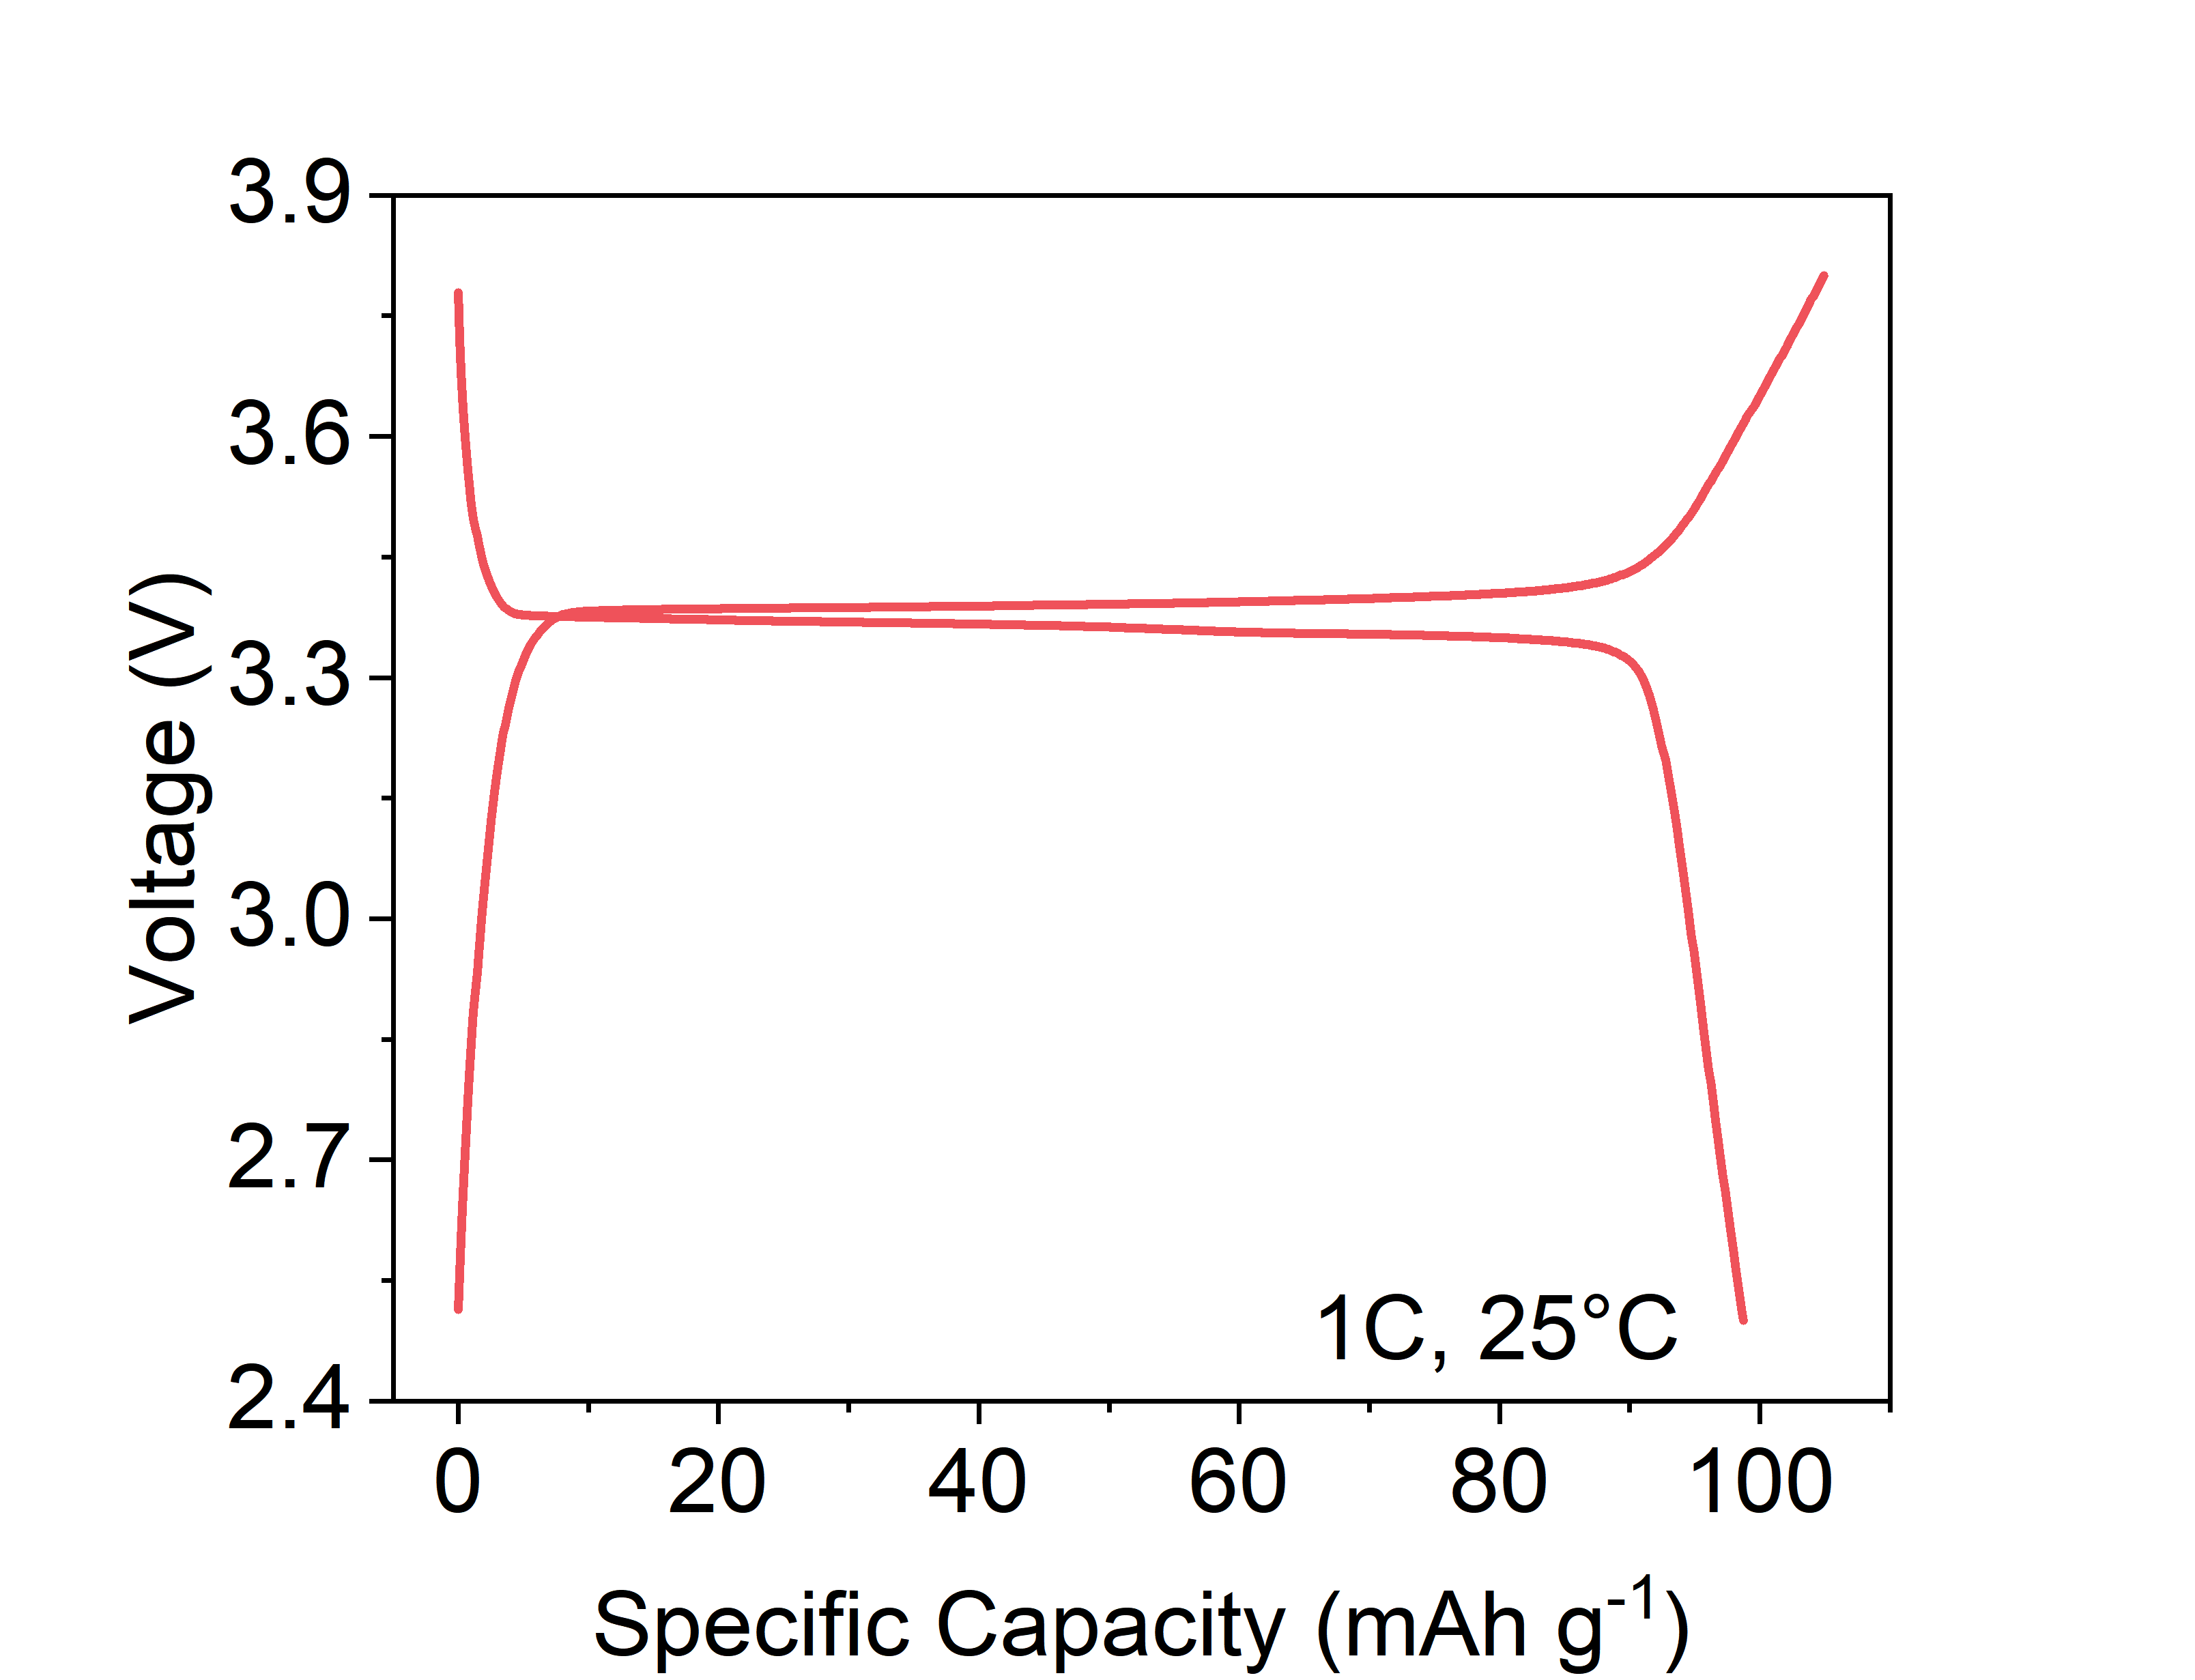


**Figure S10.** Galvanostatic charge-discharge (GCD) profiles of NVP in NaPF6-THF-Na2B12H12 electrolyte at 1 C@25 °C.


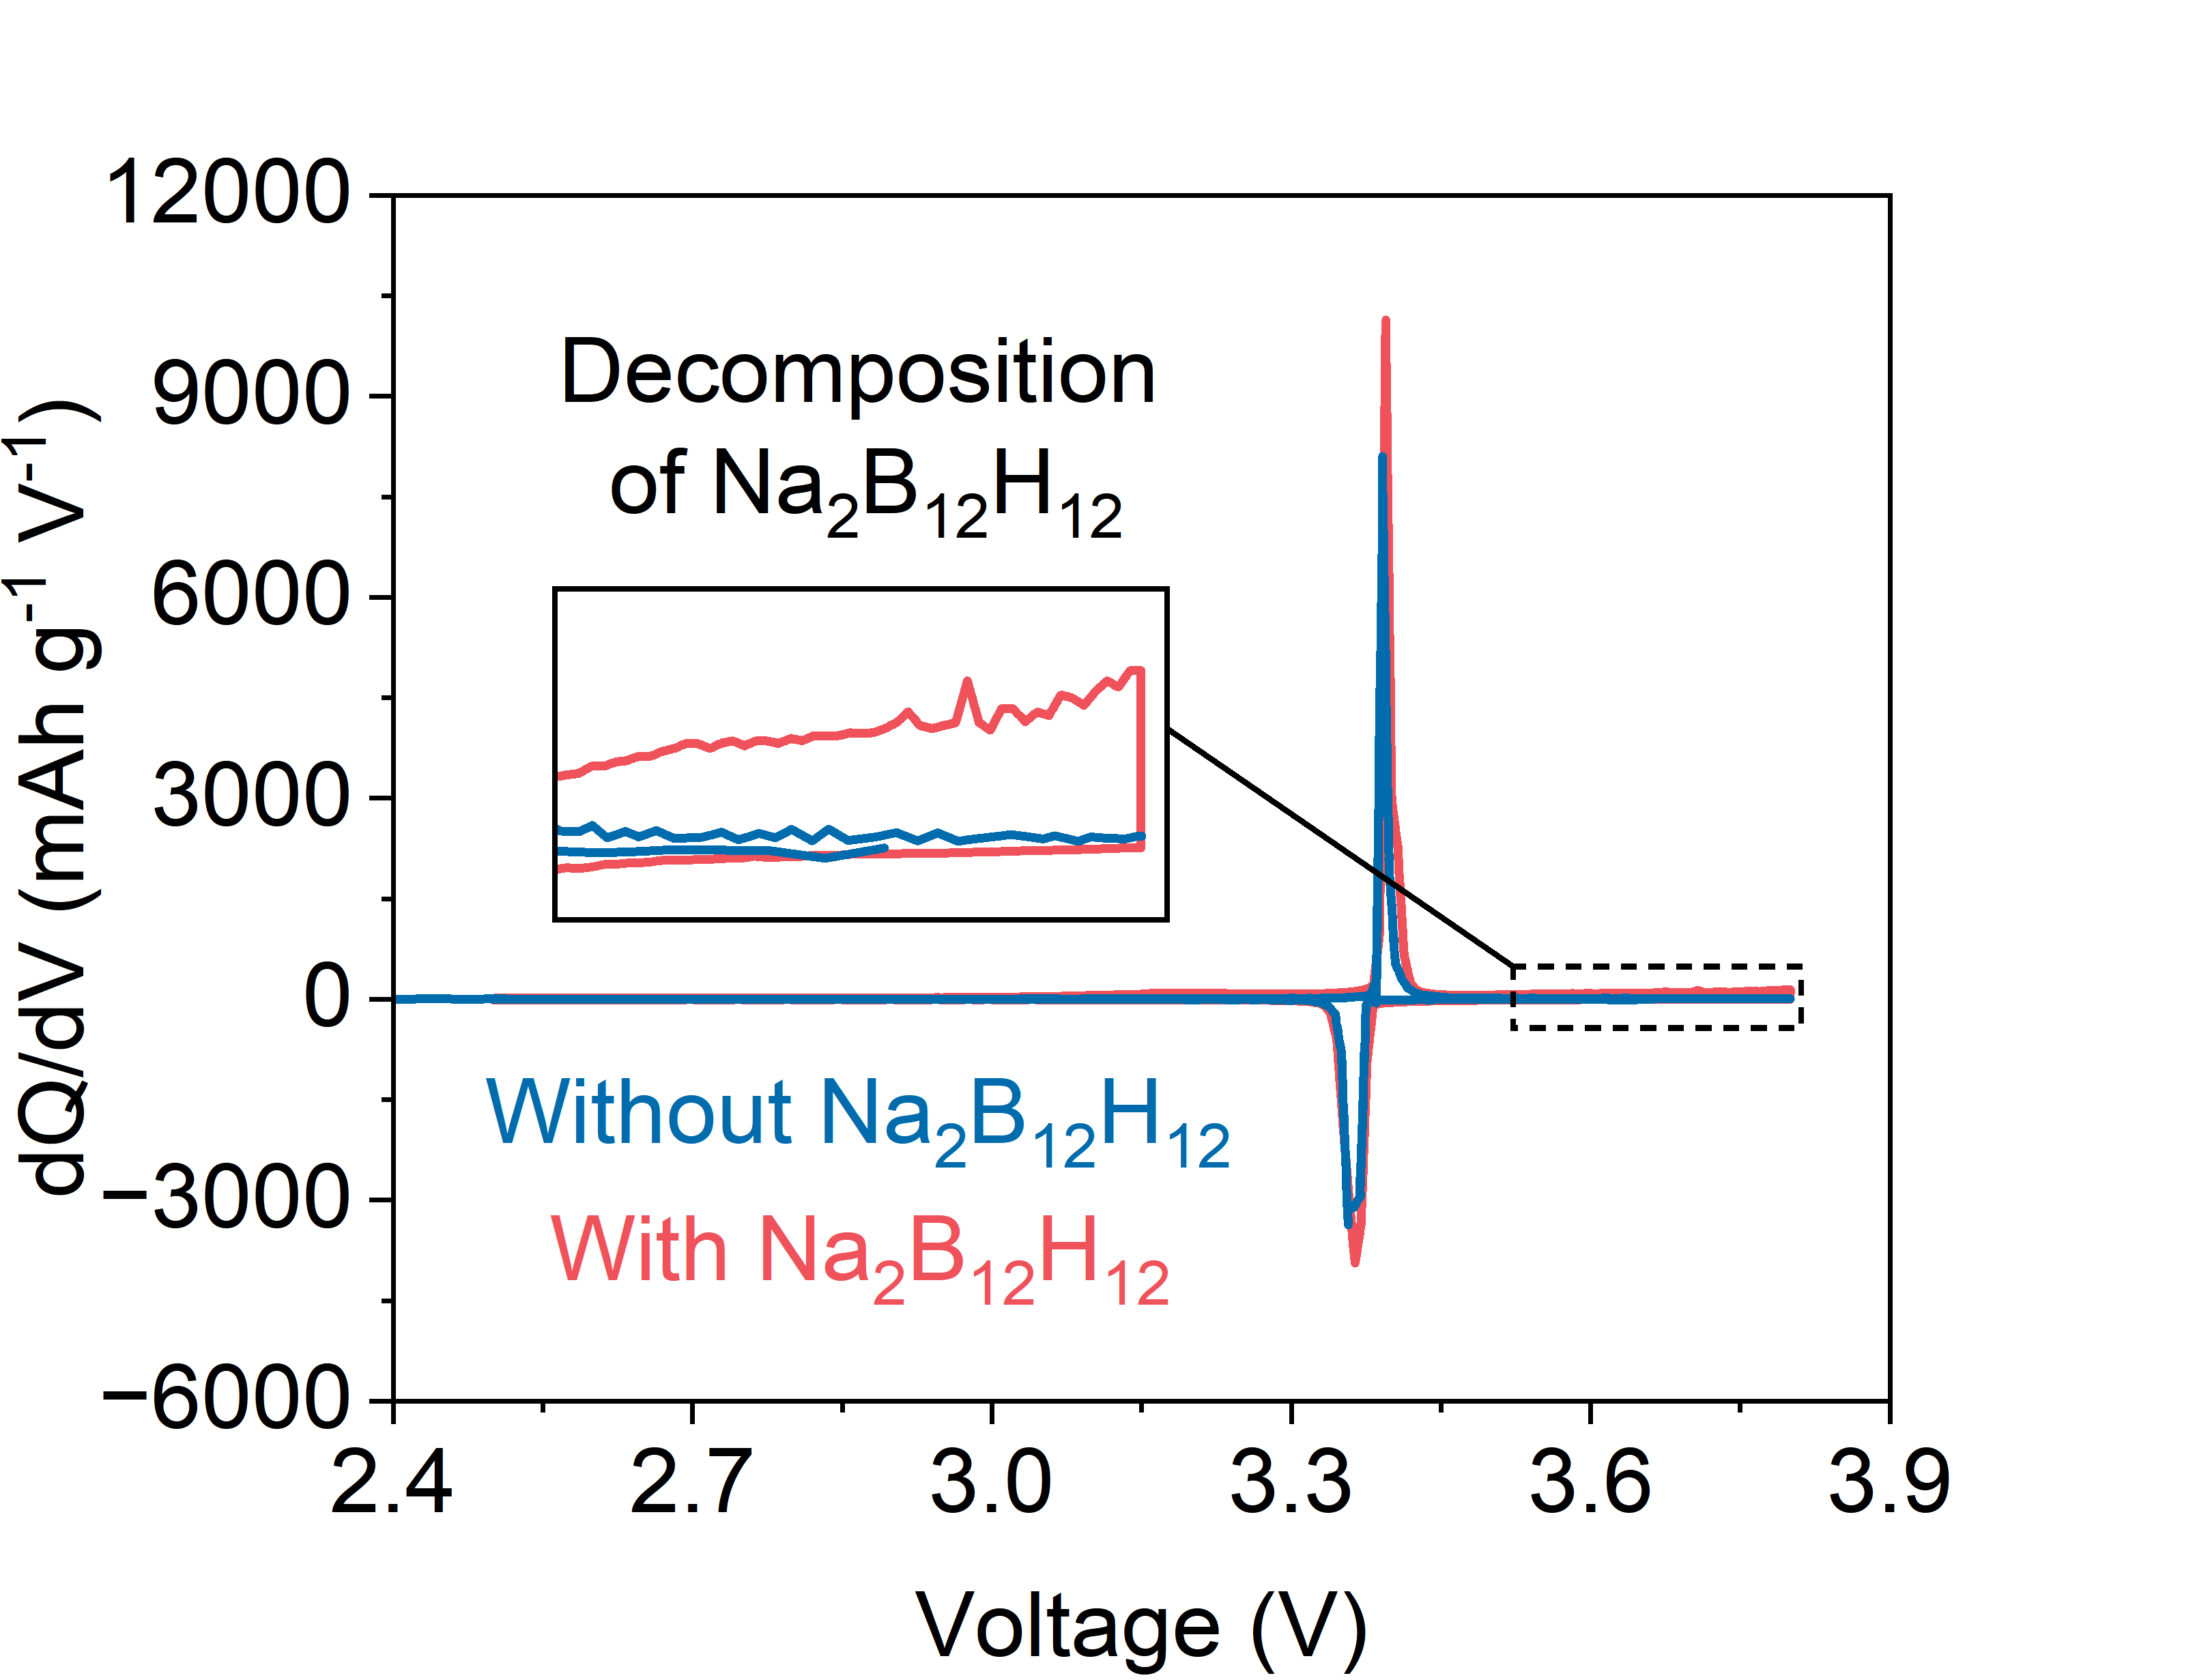


**Figure S11.** dQ/dV curves of NVP in NaPF6-THF and NaPF6-THF-Na2B12H12 electrolytes at 1 C@25 °C.


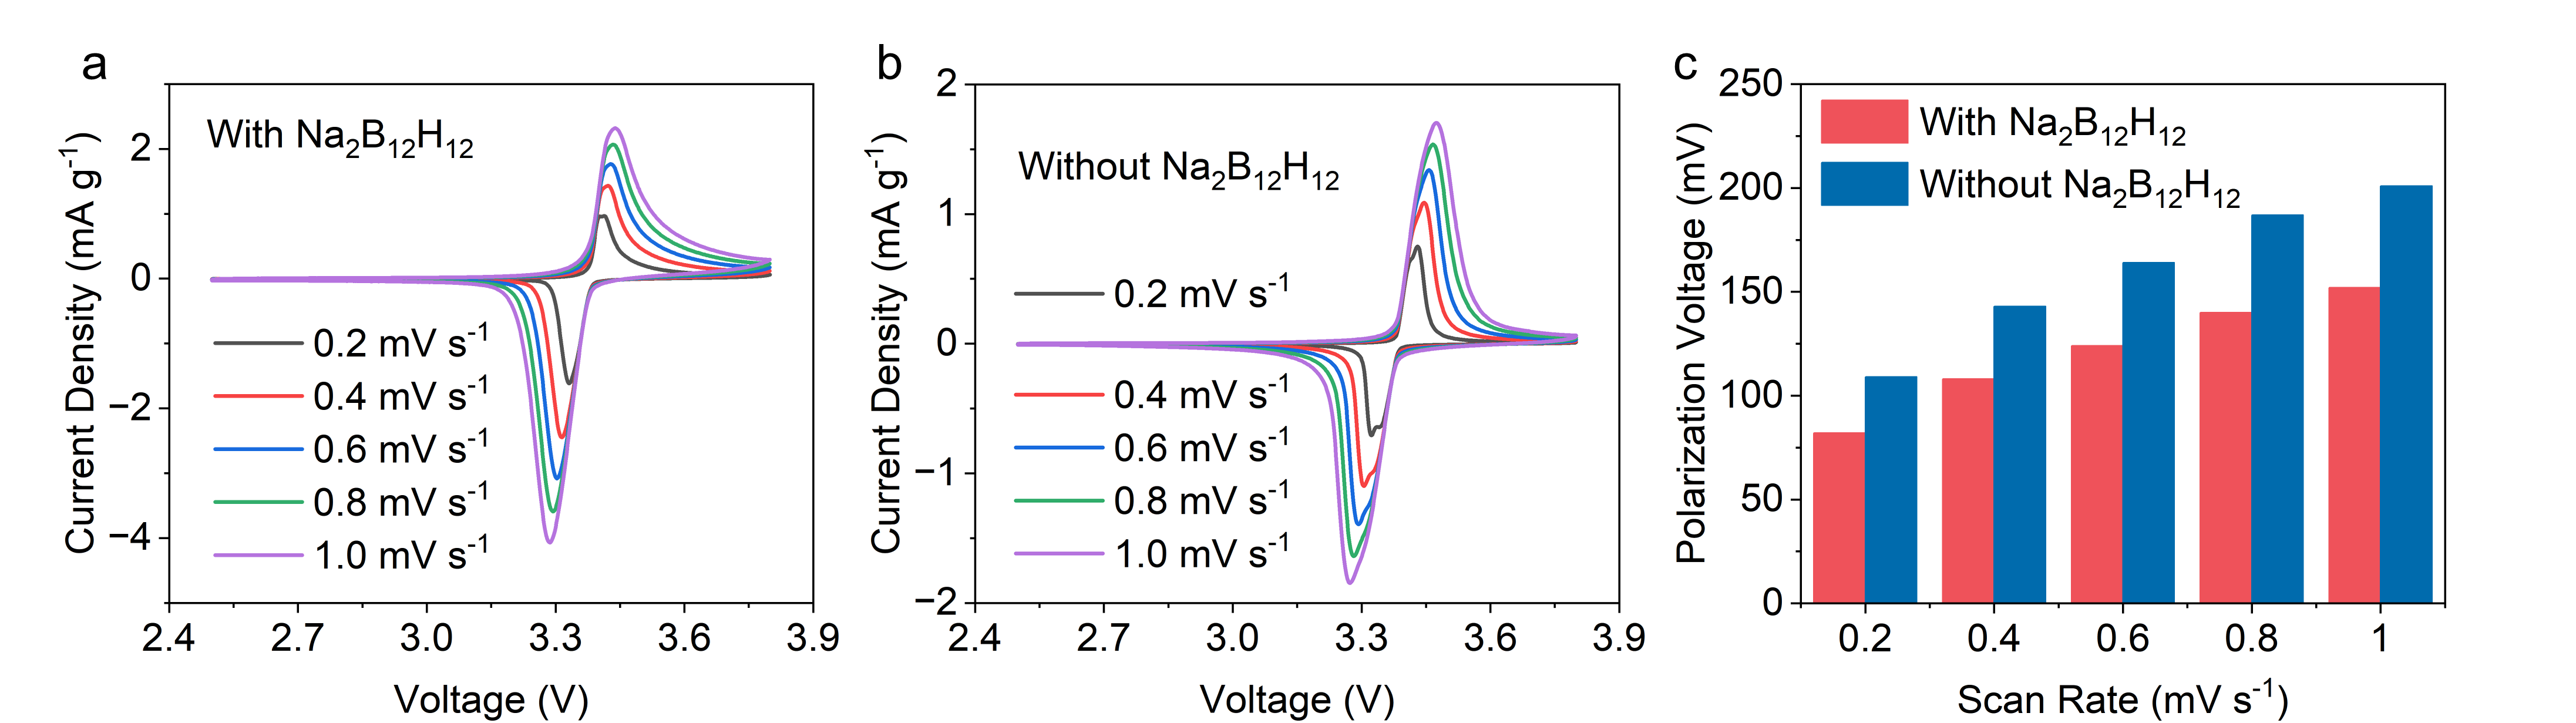


**Figure S12.** **a,b** CV curves measured at various scan rates of NVP@CC in (a) NaPF6-THF-Na2B12H12 and (b) NaPF6-THF electrolytes. **c**, Polarization voltage calculated via CV curves.


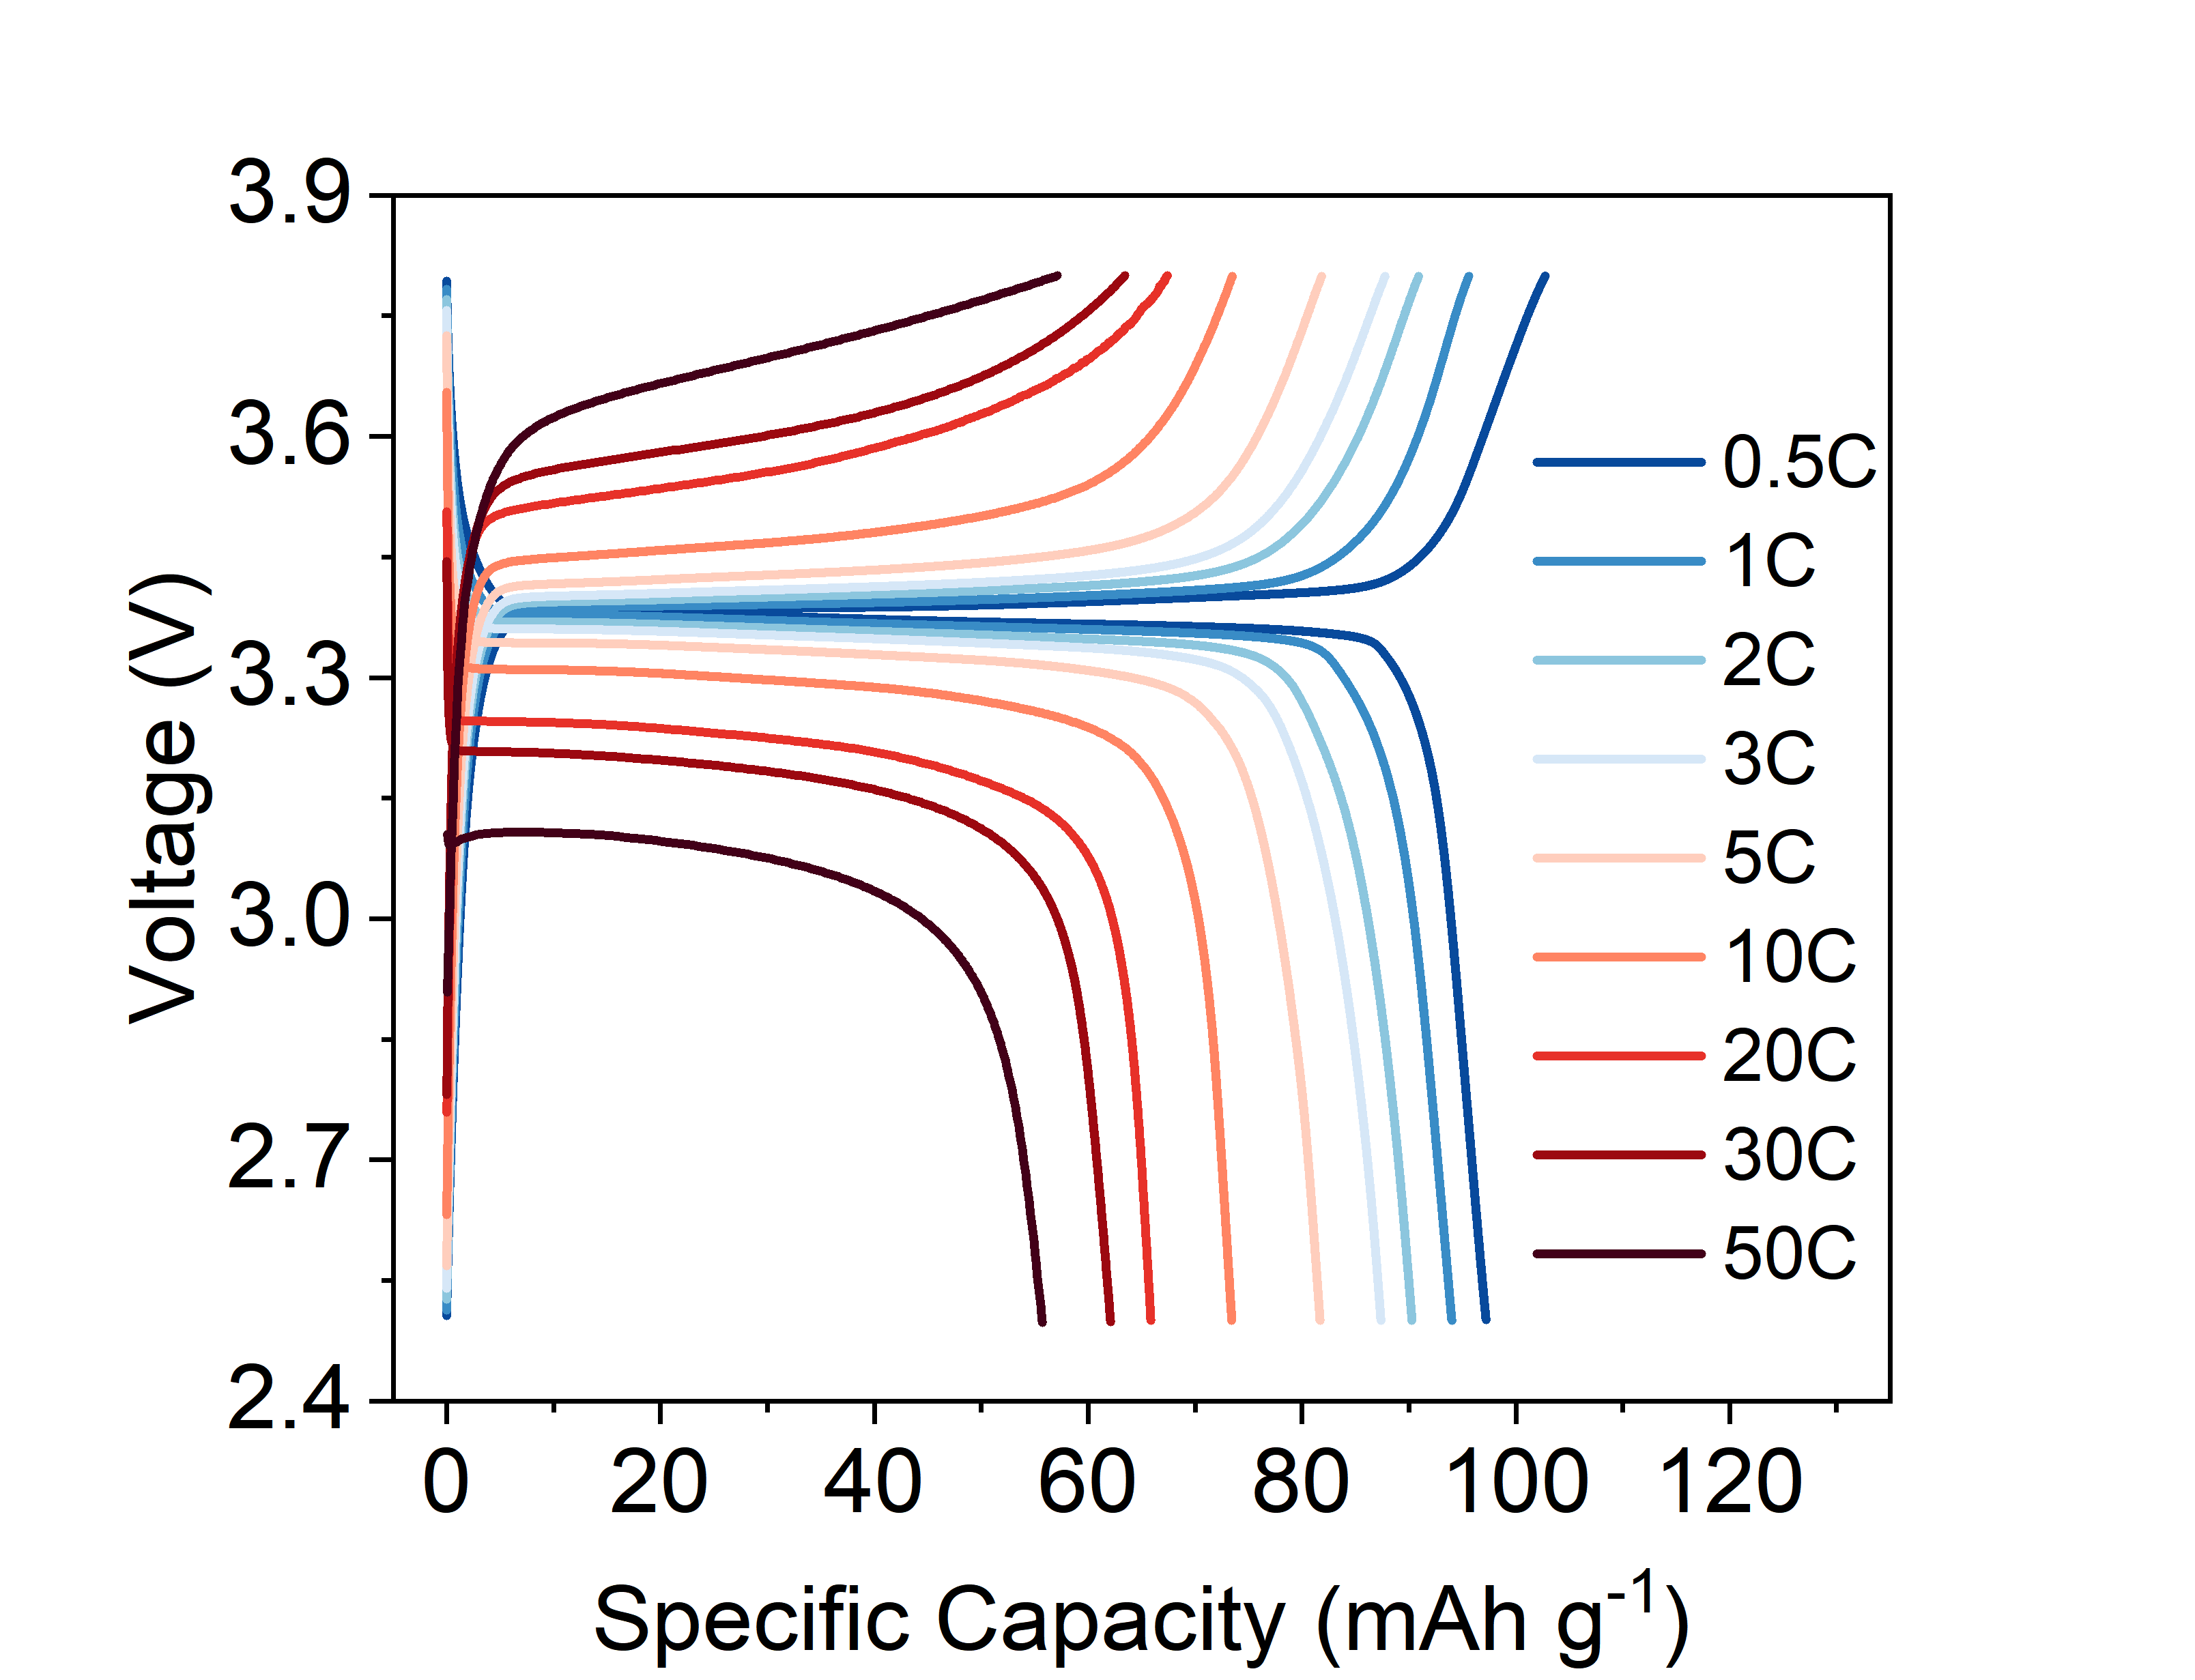


**Figure S13.** GCD curves at different current densities of NVP@CC in NaPF6-THF-Na2B12H12 electrolyte at 25 °C.


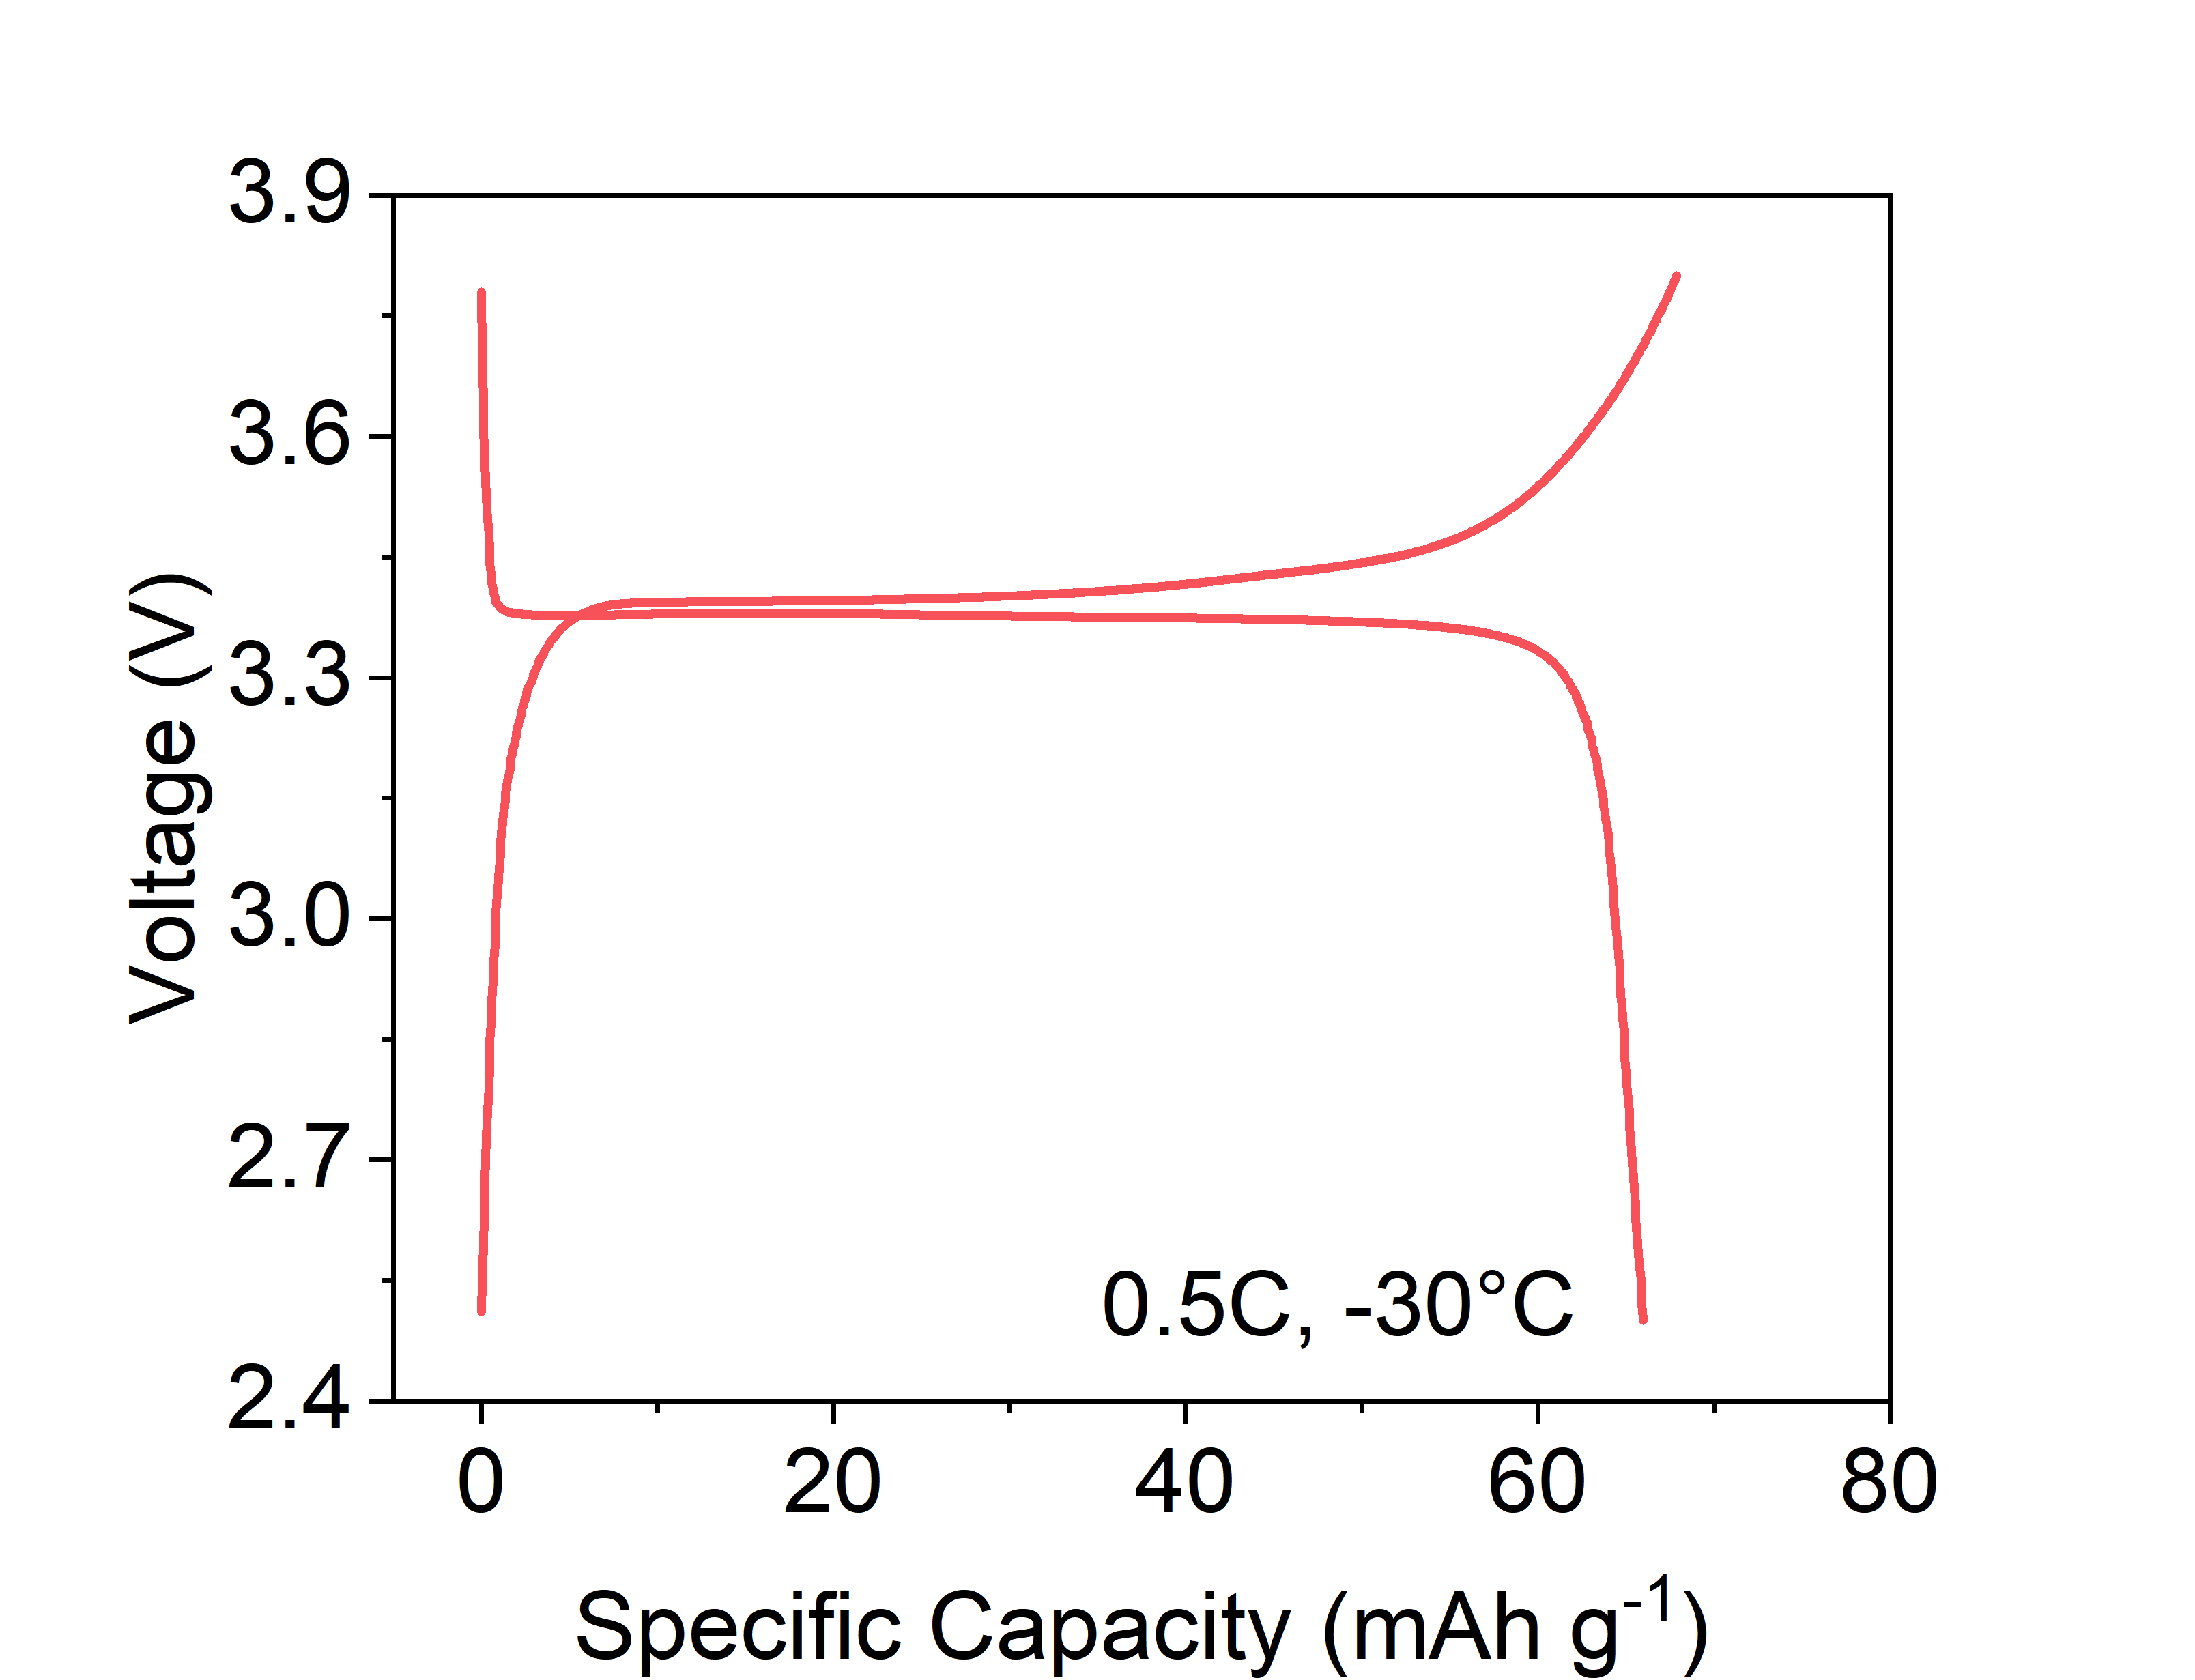


**Figure S14.** 1C GCD curves of NVP@CC in NaPF6-THF-Na2B12H12 electrolyte at −30 °C.

**Table S1.** Comparison of electrochemical performance.

| Reference | Electrolyte | Temperature (°C) | Rate (C) | Lifespan |
| --- | --- | --- | --- | --- |
| 32 | G2/THF | −20 | 0.5 | 275 |
| 33 | ES/PC/DEC | −40 | 0.2 | 300 |
| 34 | G2/DOL | −40 | 0.2 | 100 |
| 35 | EC/PC/FEC | −25 | 3.4 | 1000 |
| 36 | EC/PC/FEC | −15 | 1 | 800 |
| 37 | G2 | −20 | 2 | 1000 |
| 38 | PC/FEC | −20 | 2 | 1000 |
| 39 | EC/PC | −25 | 2.4 | 1000 |


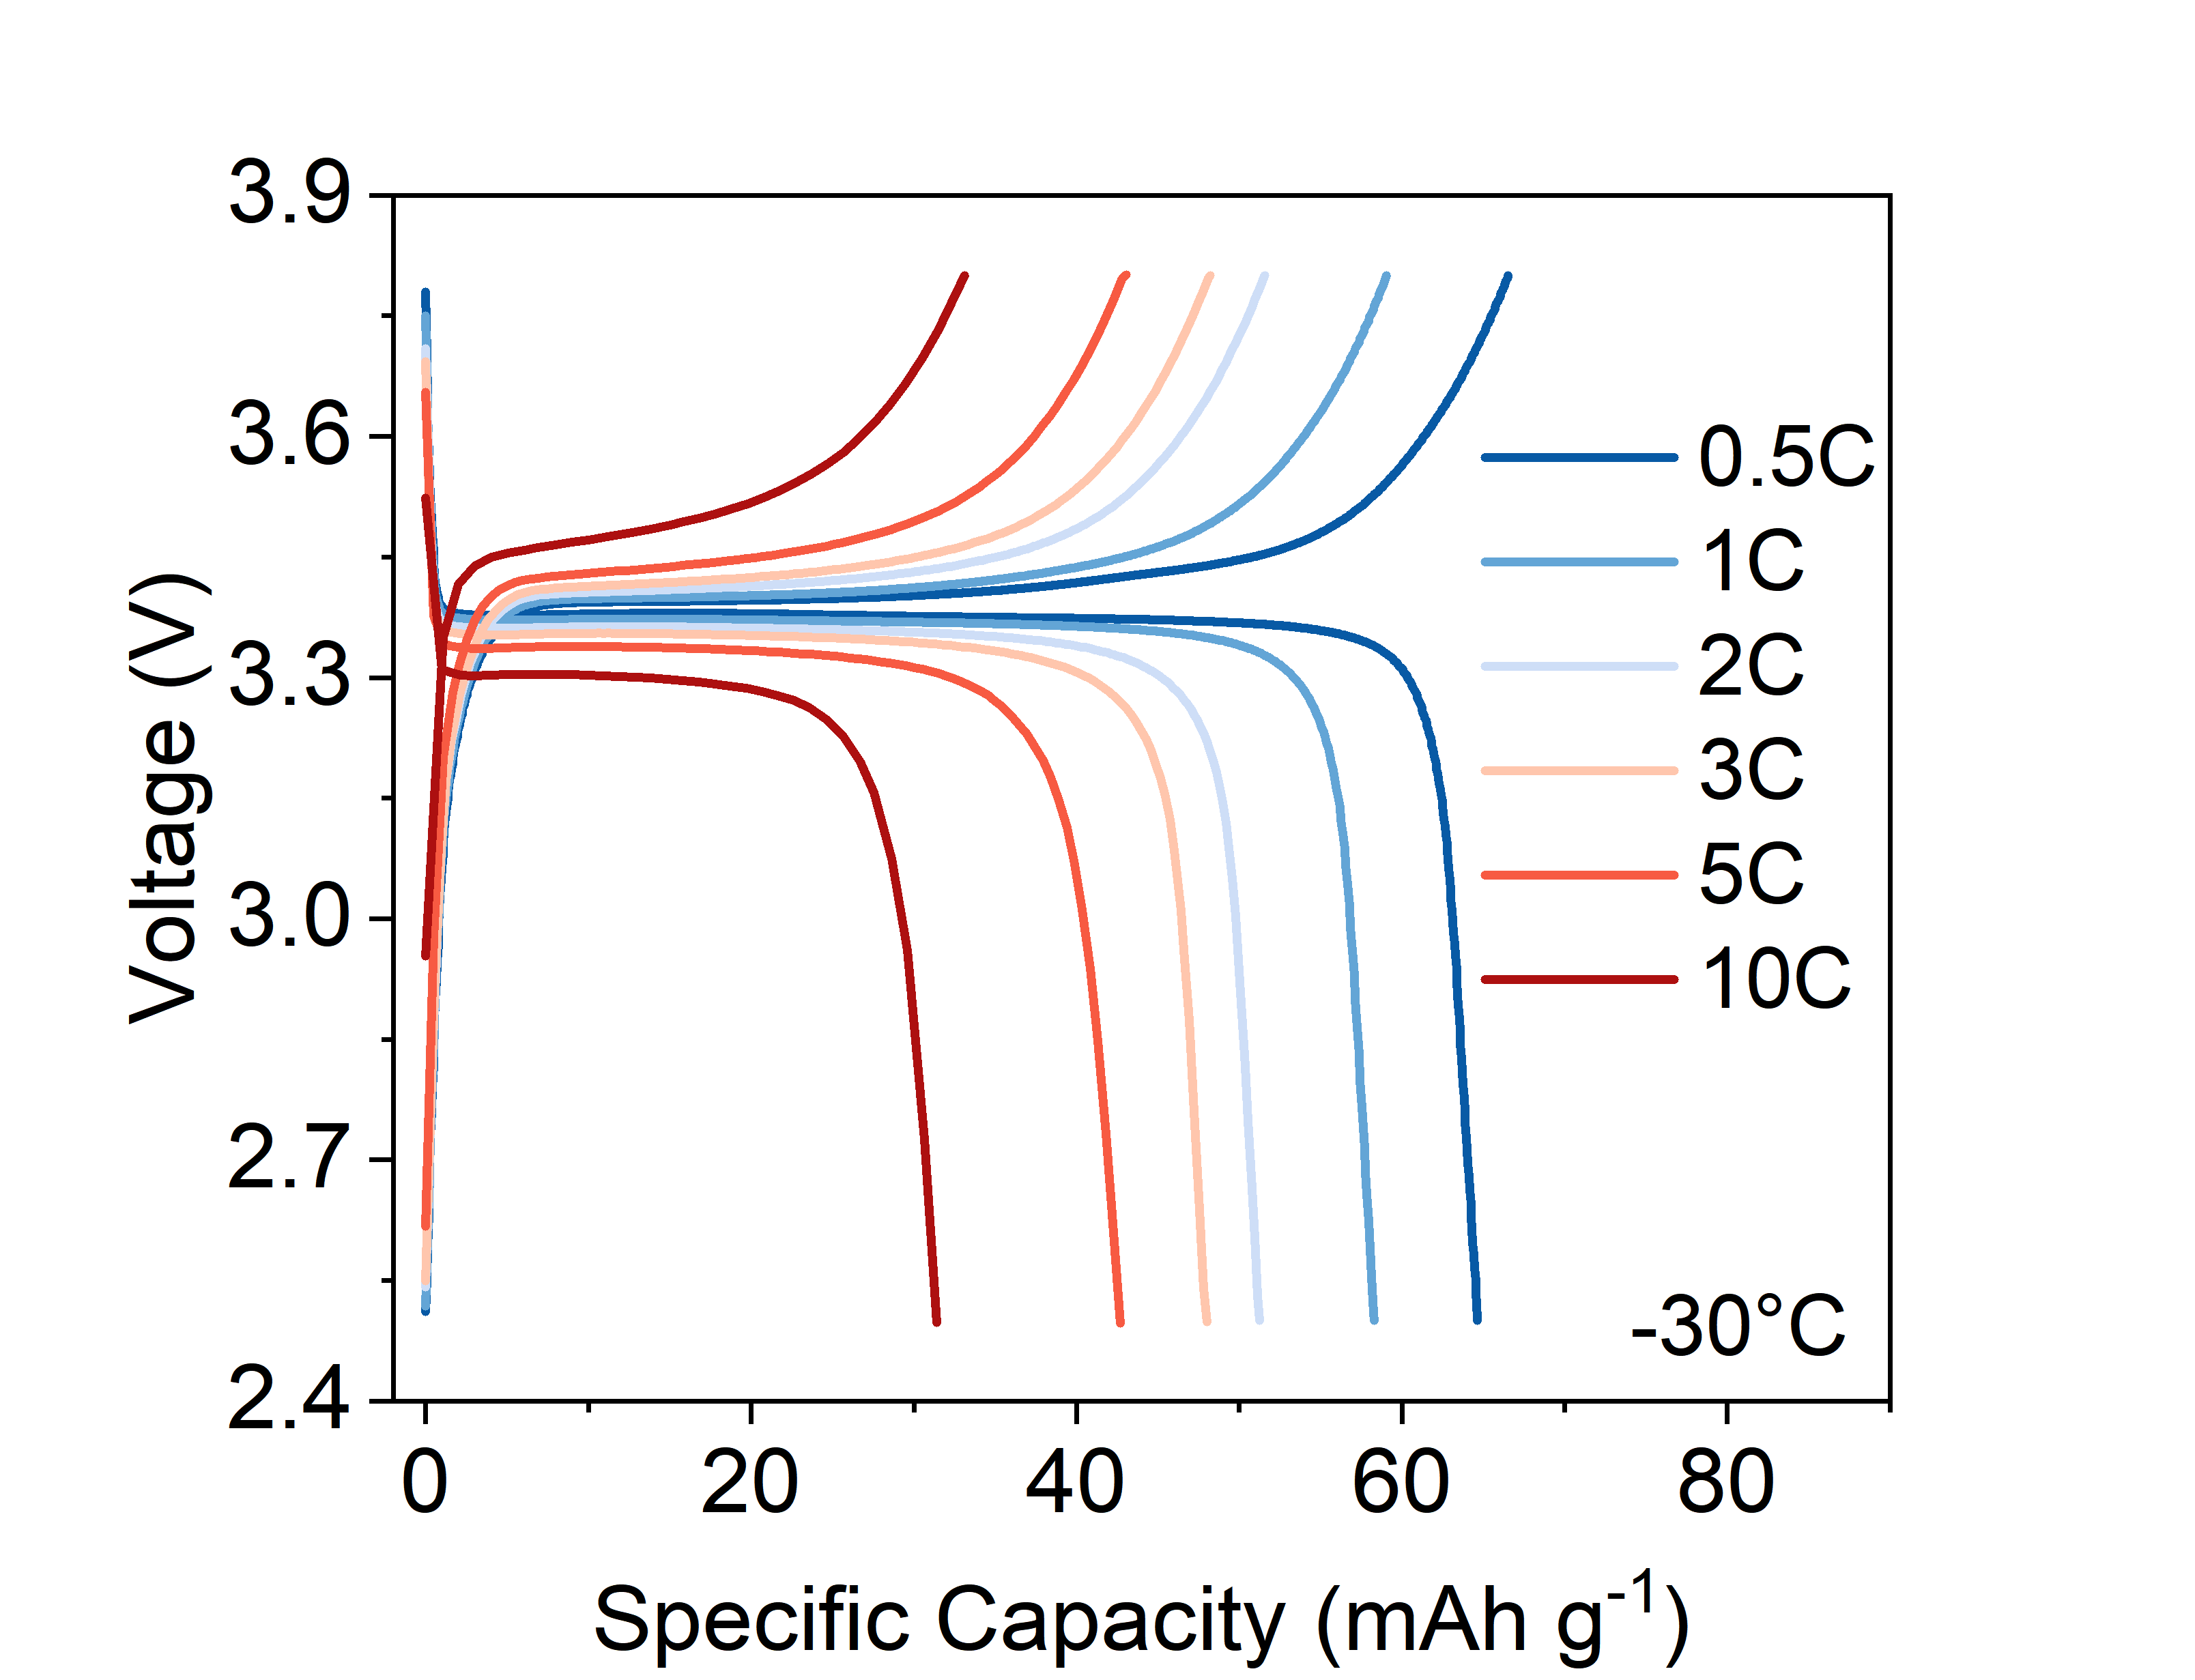


**Figure S15.** GCD curves at different current densities of NVP@CC in NaPF6-THF-Na2B12H12 electrolyte at −30 °C.


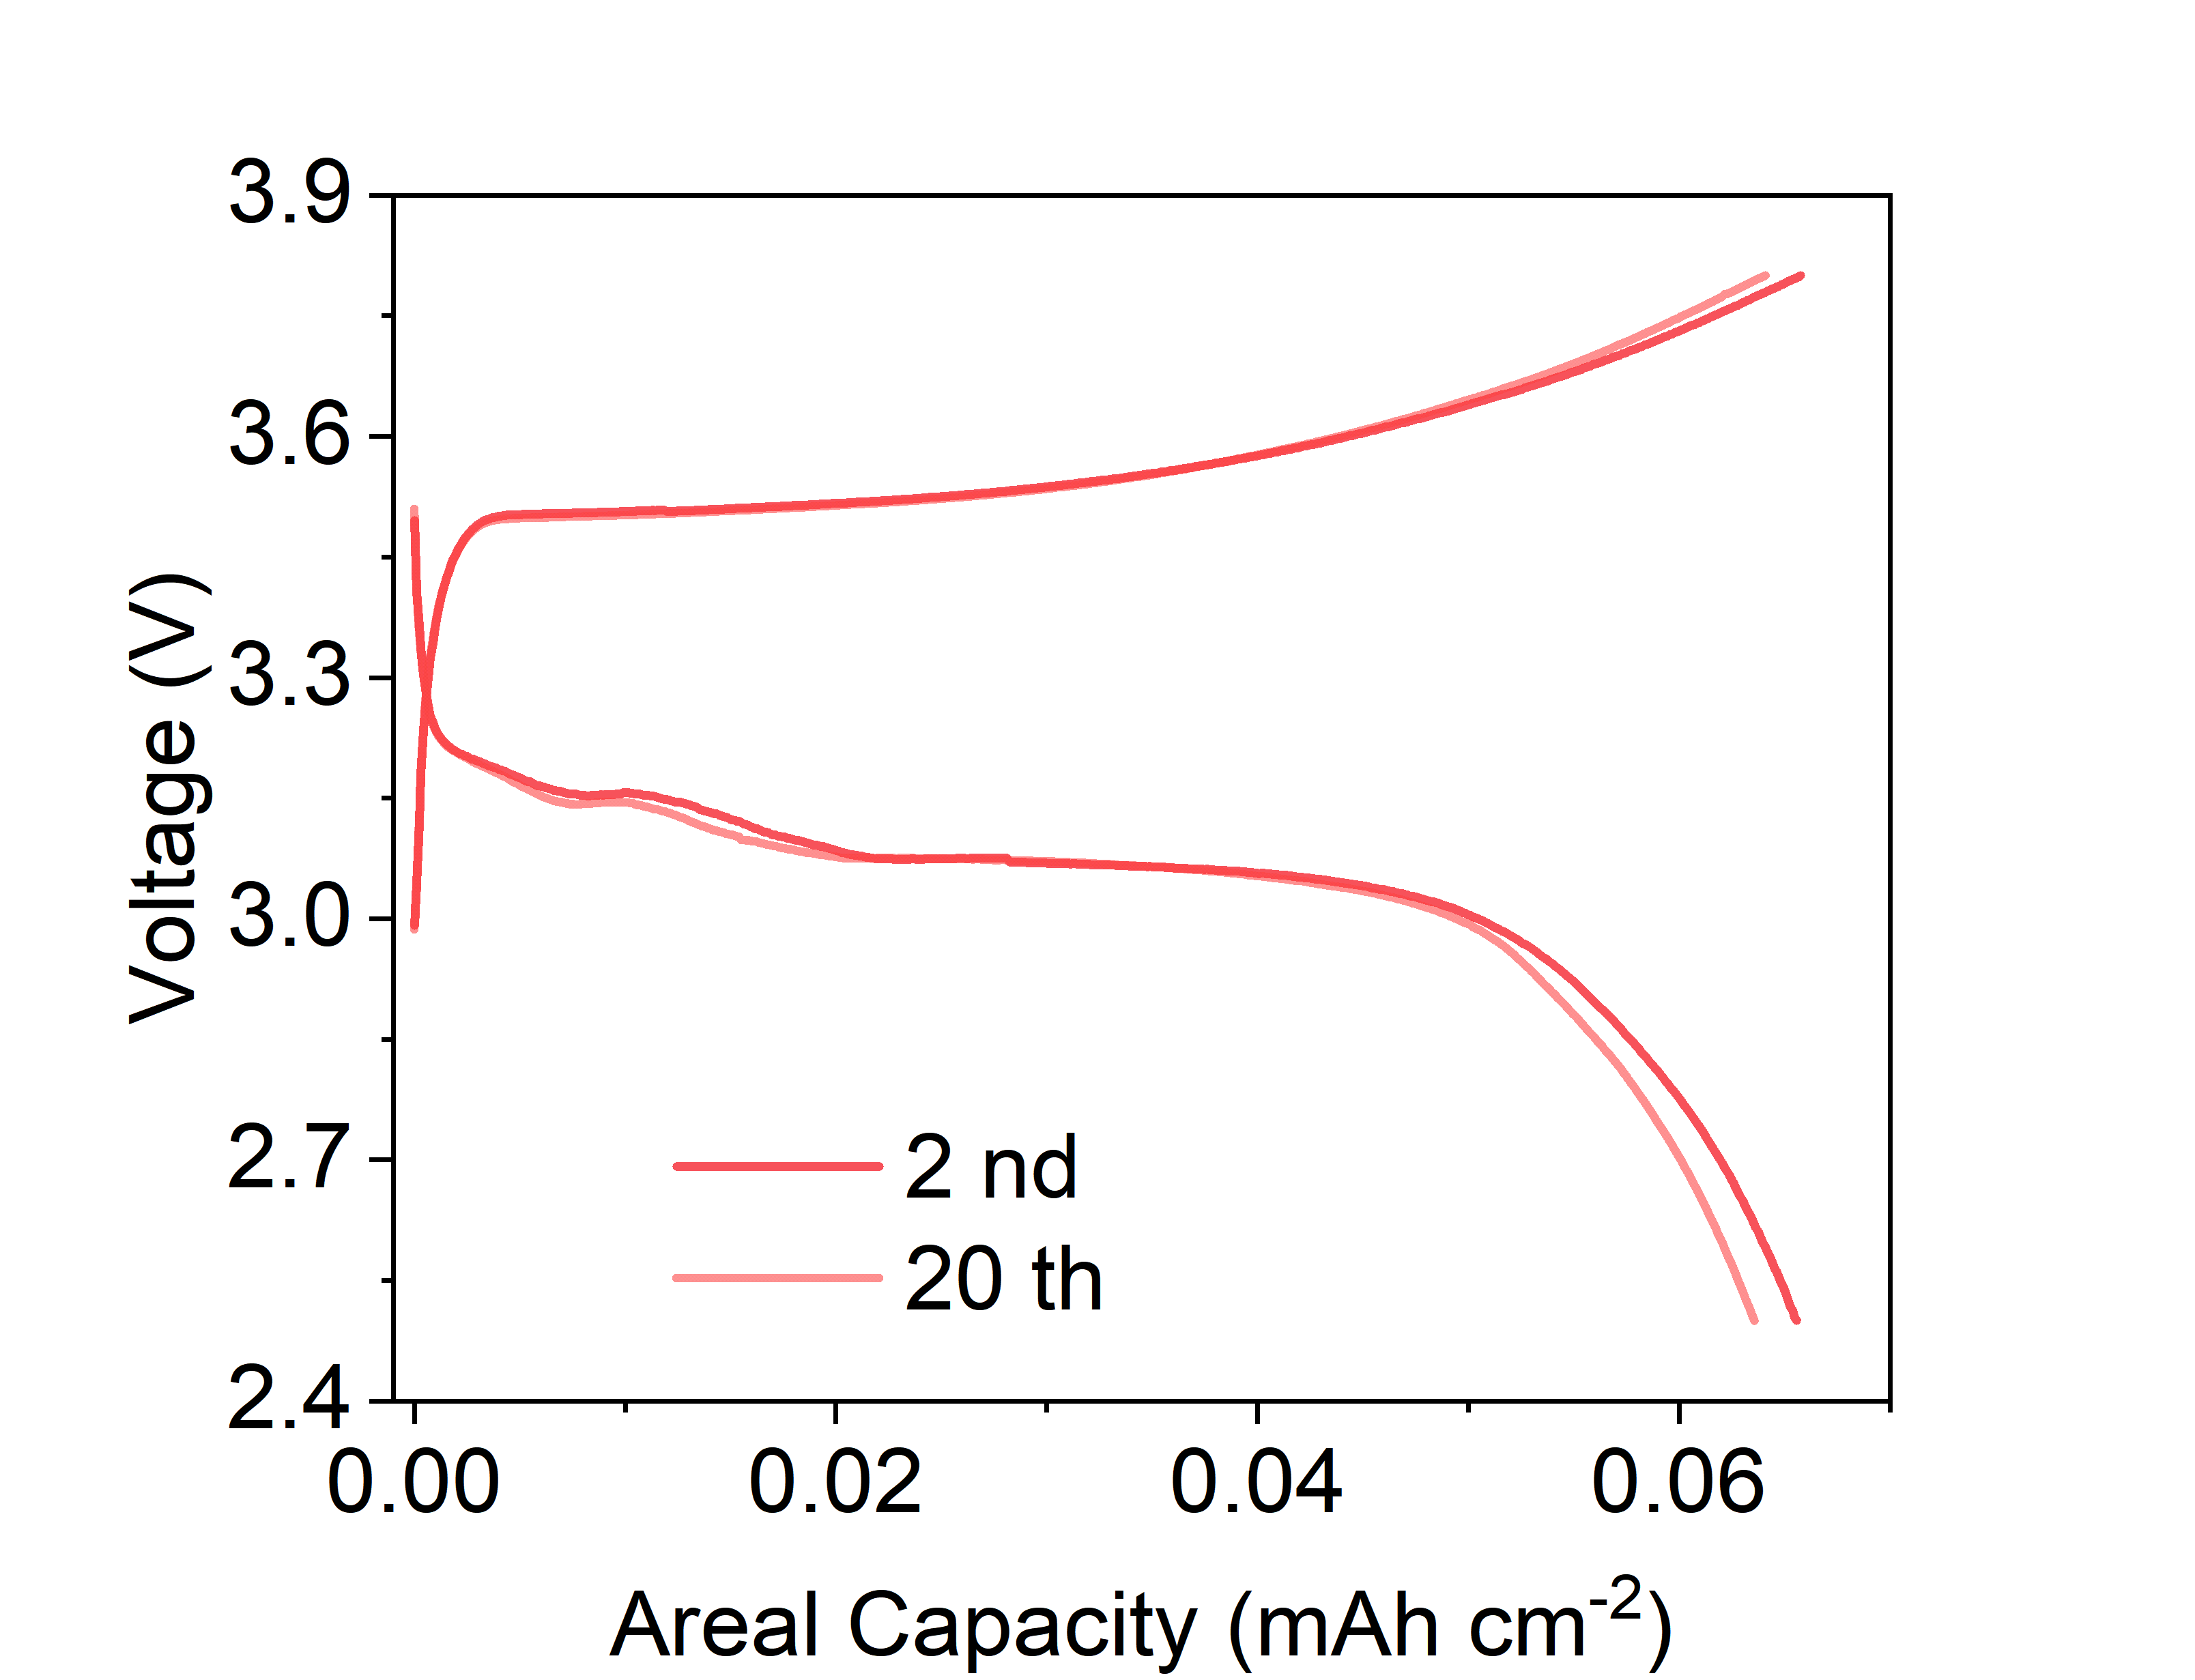


**Figure S16.** GCD curves of pouch cell at 1 C@−30 °C.


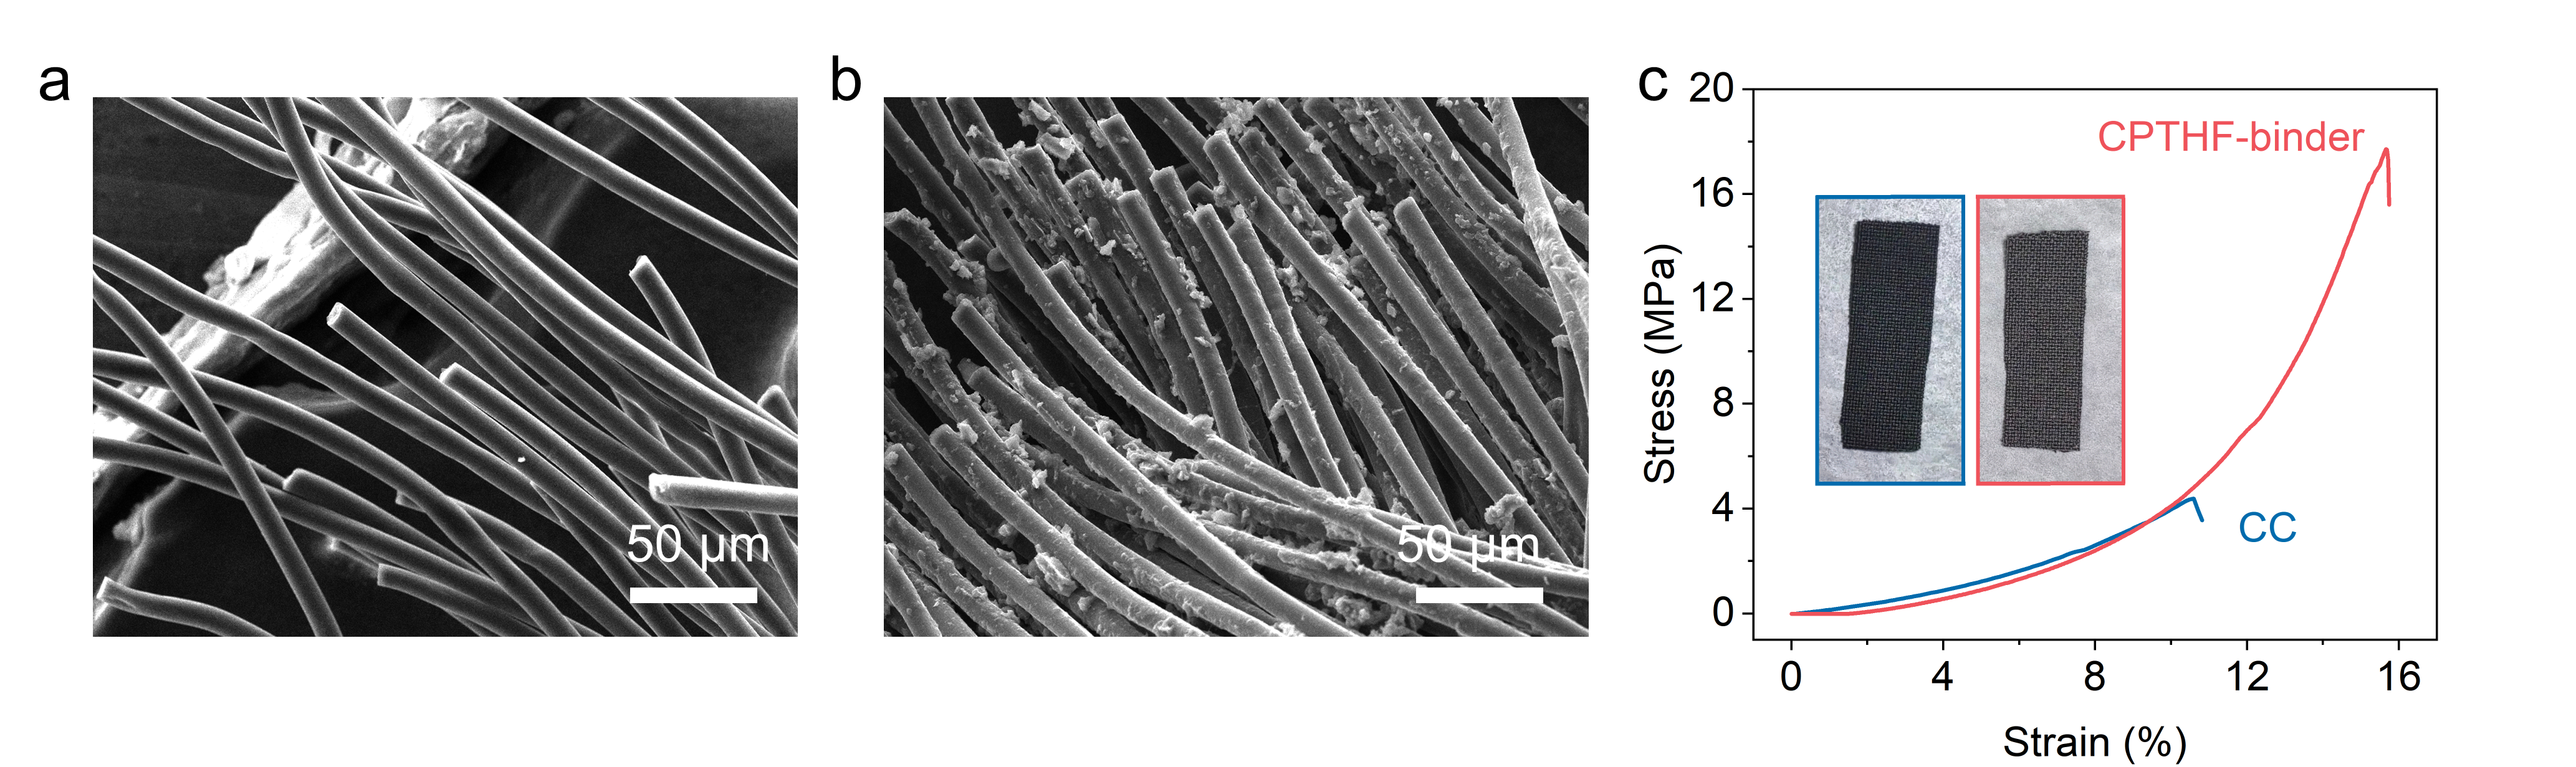


**Figure S17.** **a**, SEM image of the pristine carbon cloth after stretching. **b**, SEM image of CPTHF@NVP@CC electrode after stretching.


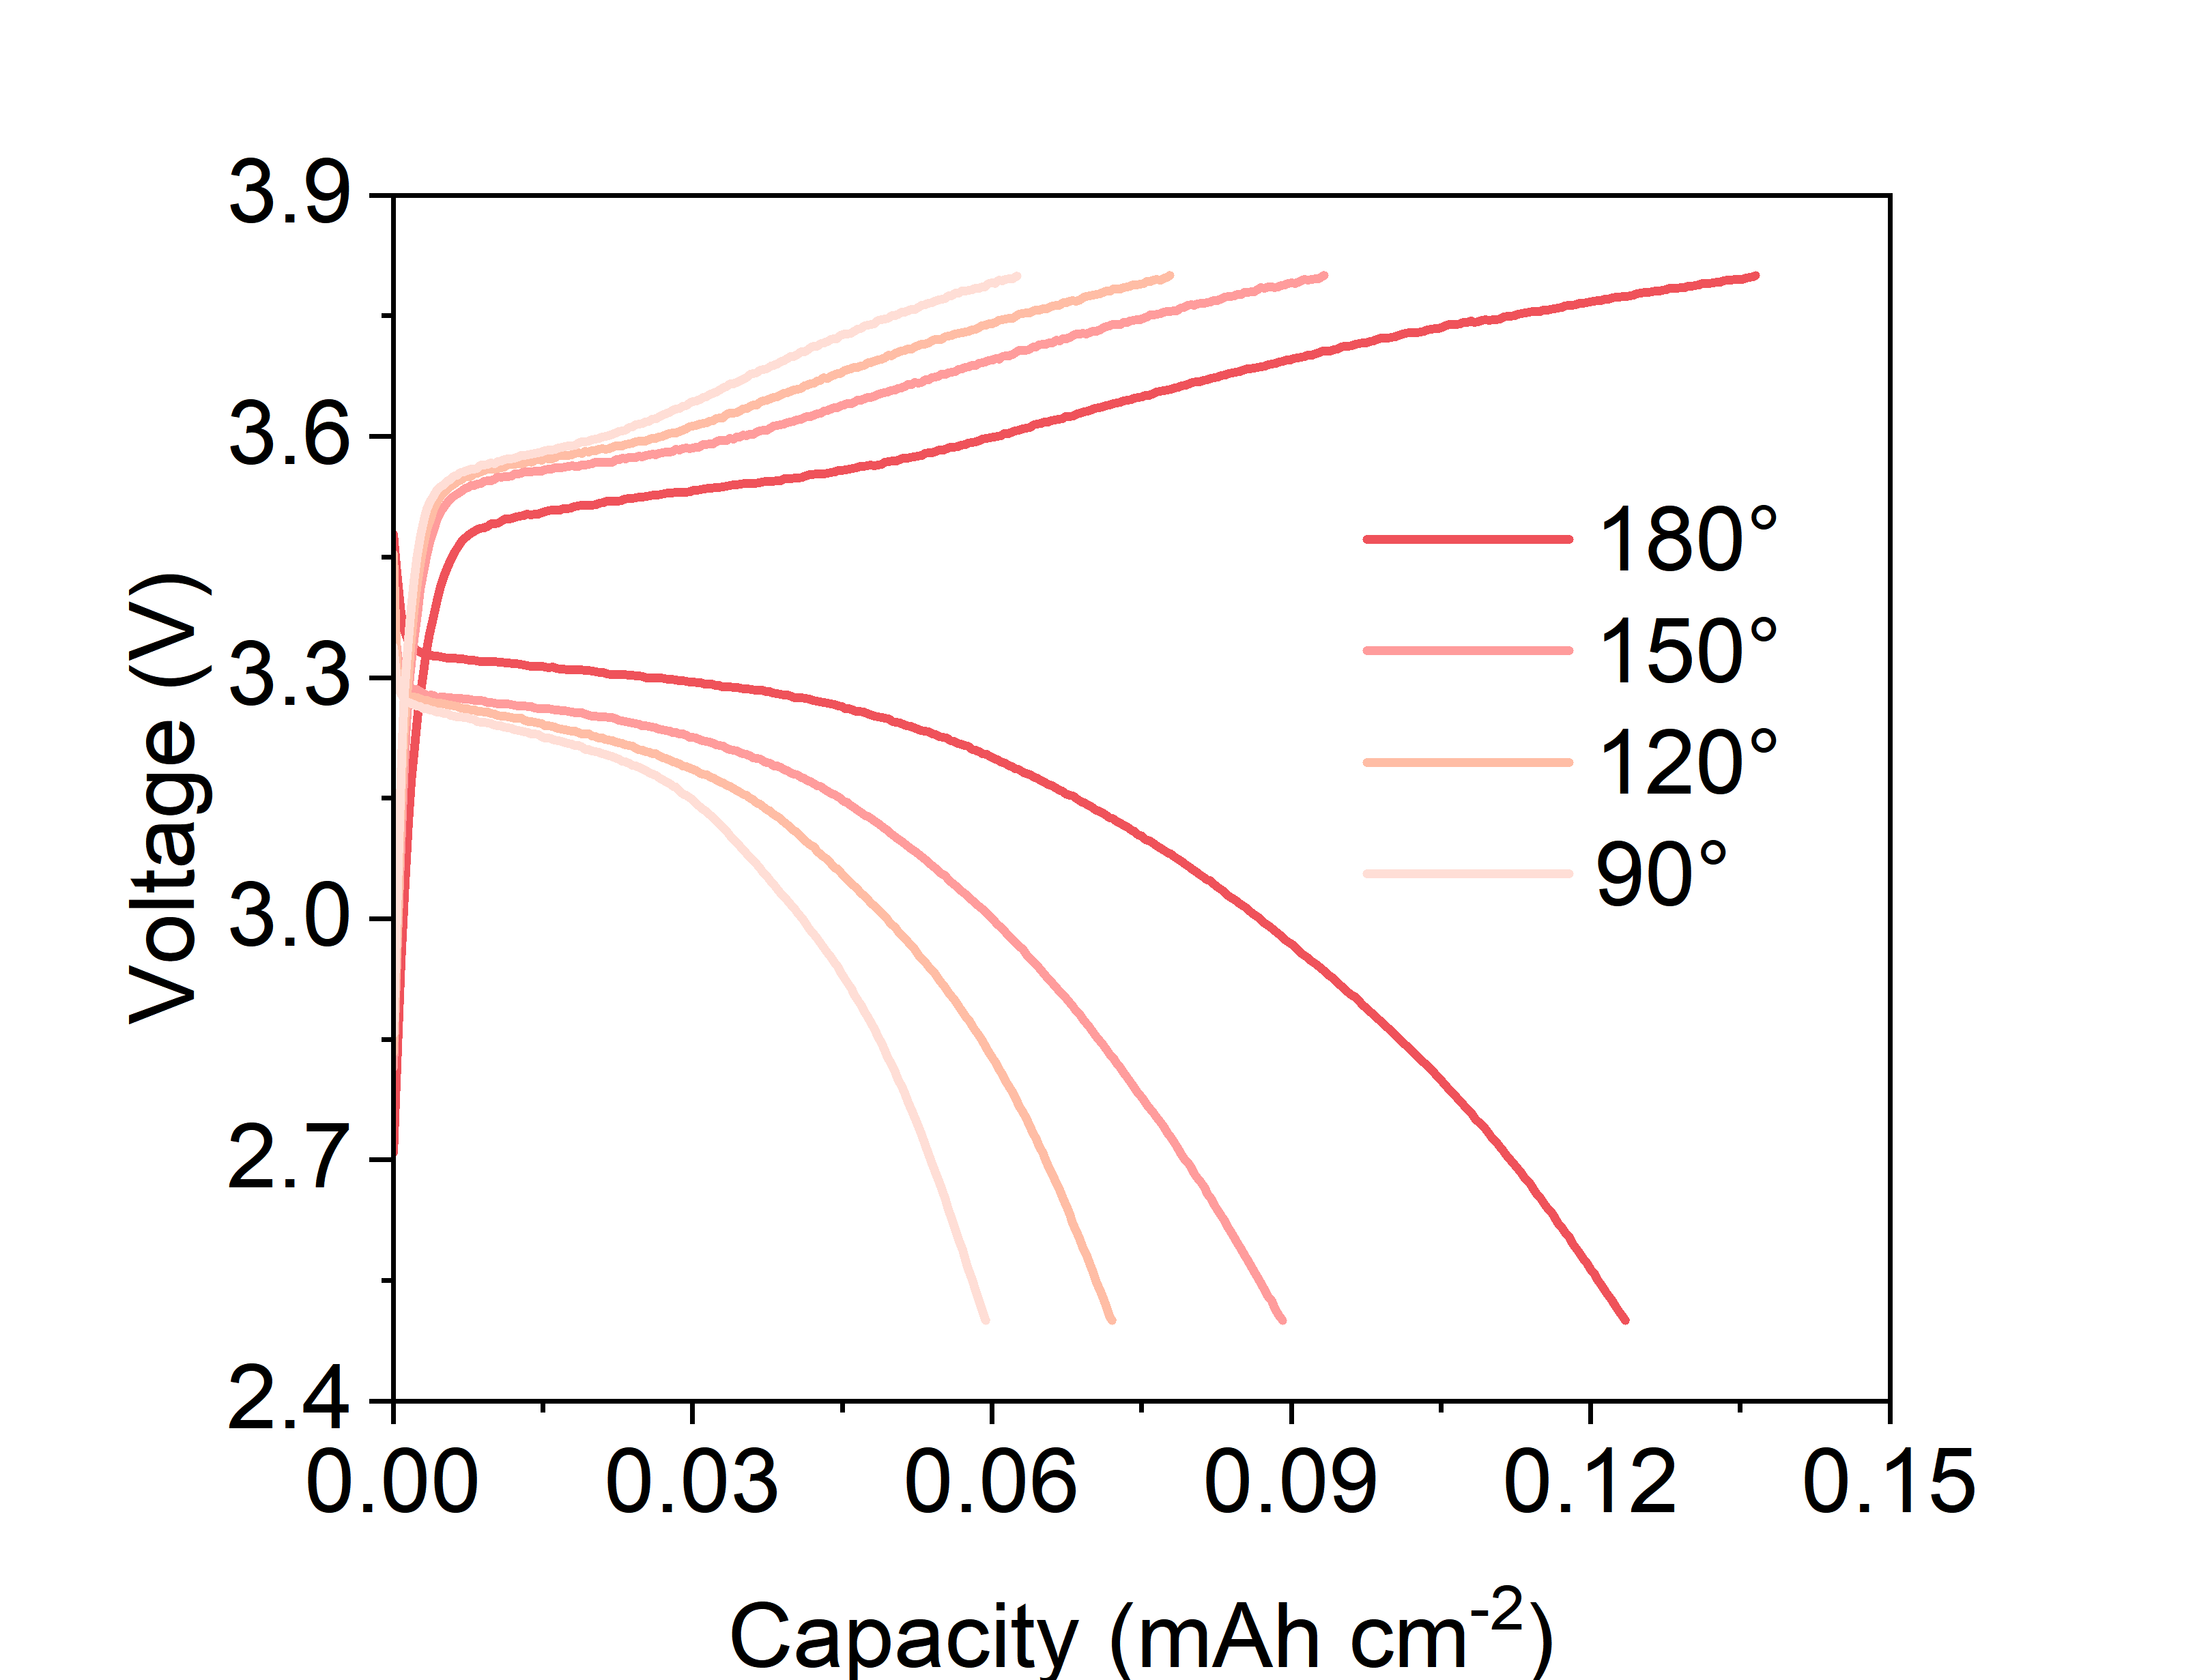


**Figure S18.** GCD curves of the pouch cell under different bending angles at 25 °C.


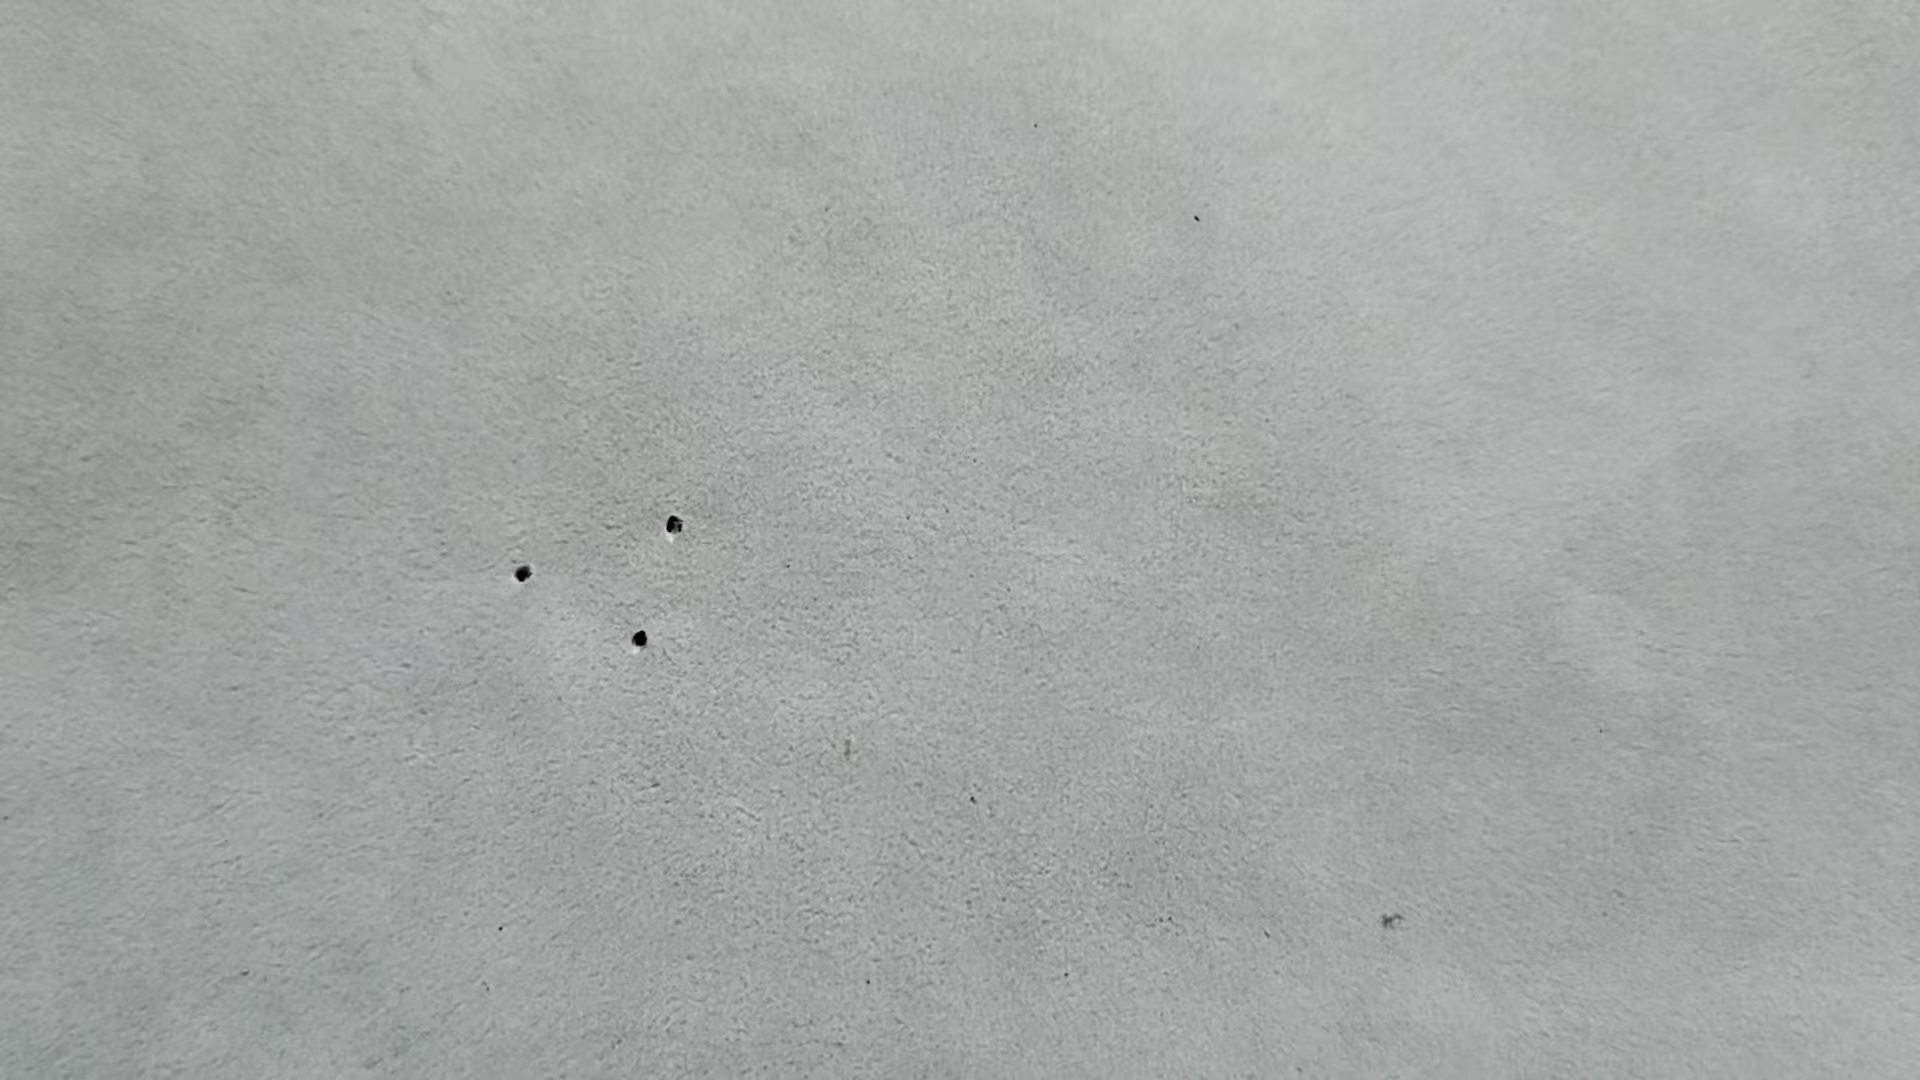


**Figure S19.** Absorbent paper after penetration and cutting test of pouch cell after cycles, no leakage of liquid can be observed from it.


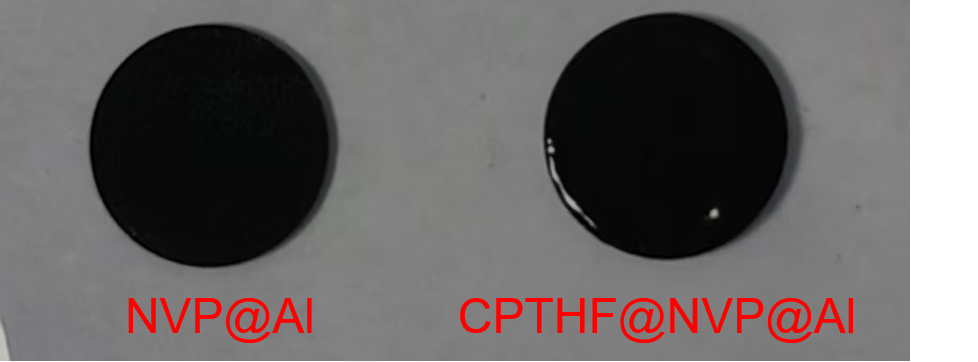


**Figure S20.** Optical images of NVP@CC and CPTHF@NVP@CC electrodes.


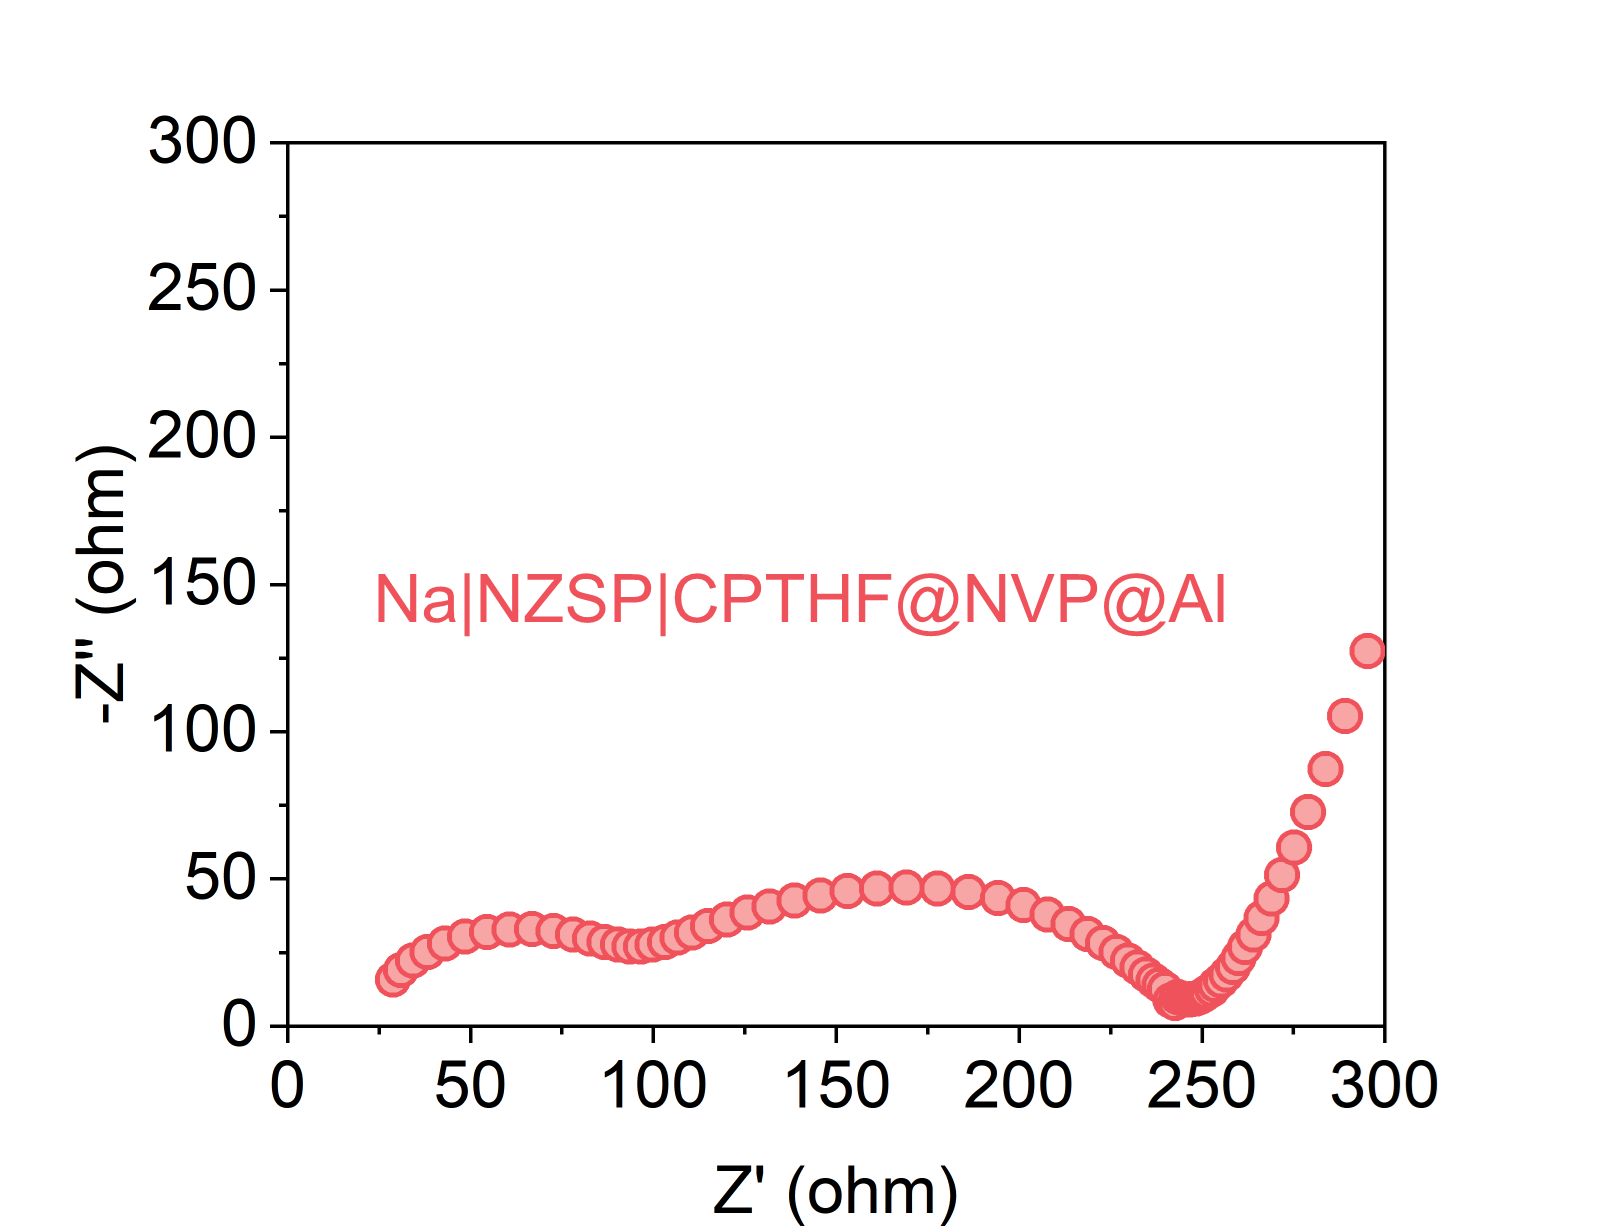


**Figure S21.** Nyquist plots of Na|NZSP|CPTHF@NVP@Al all-solid-state battery.


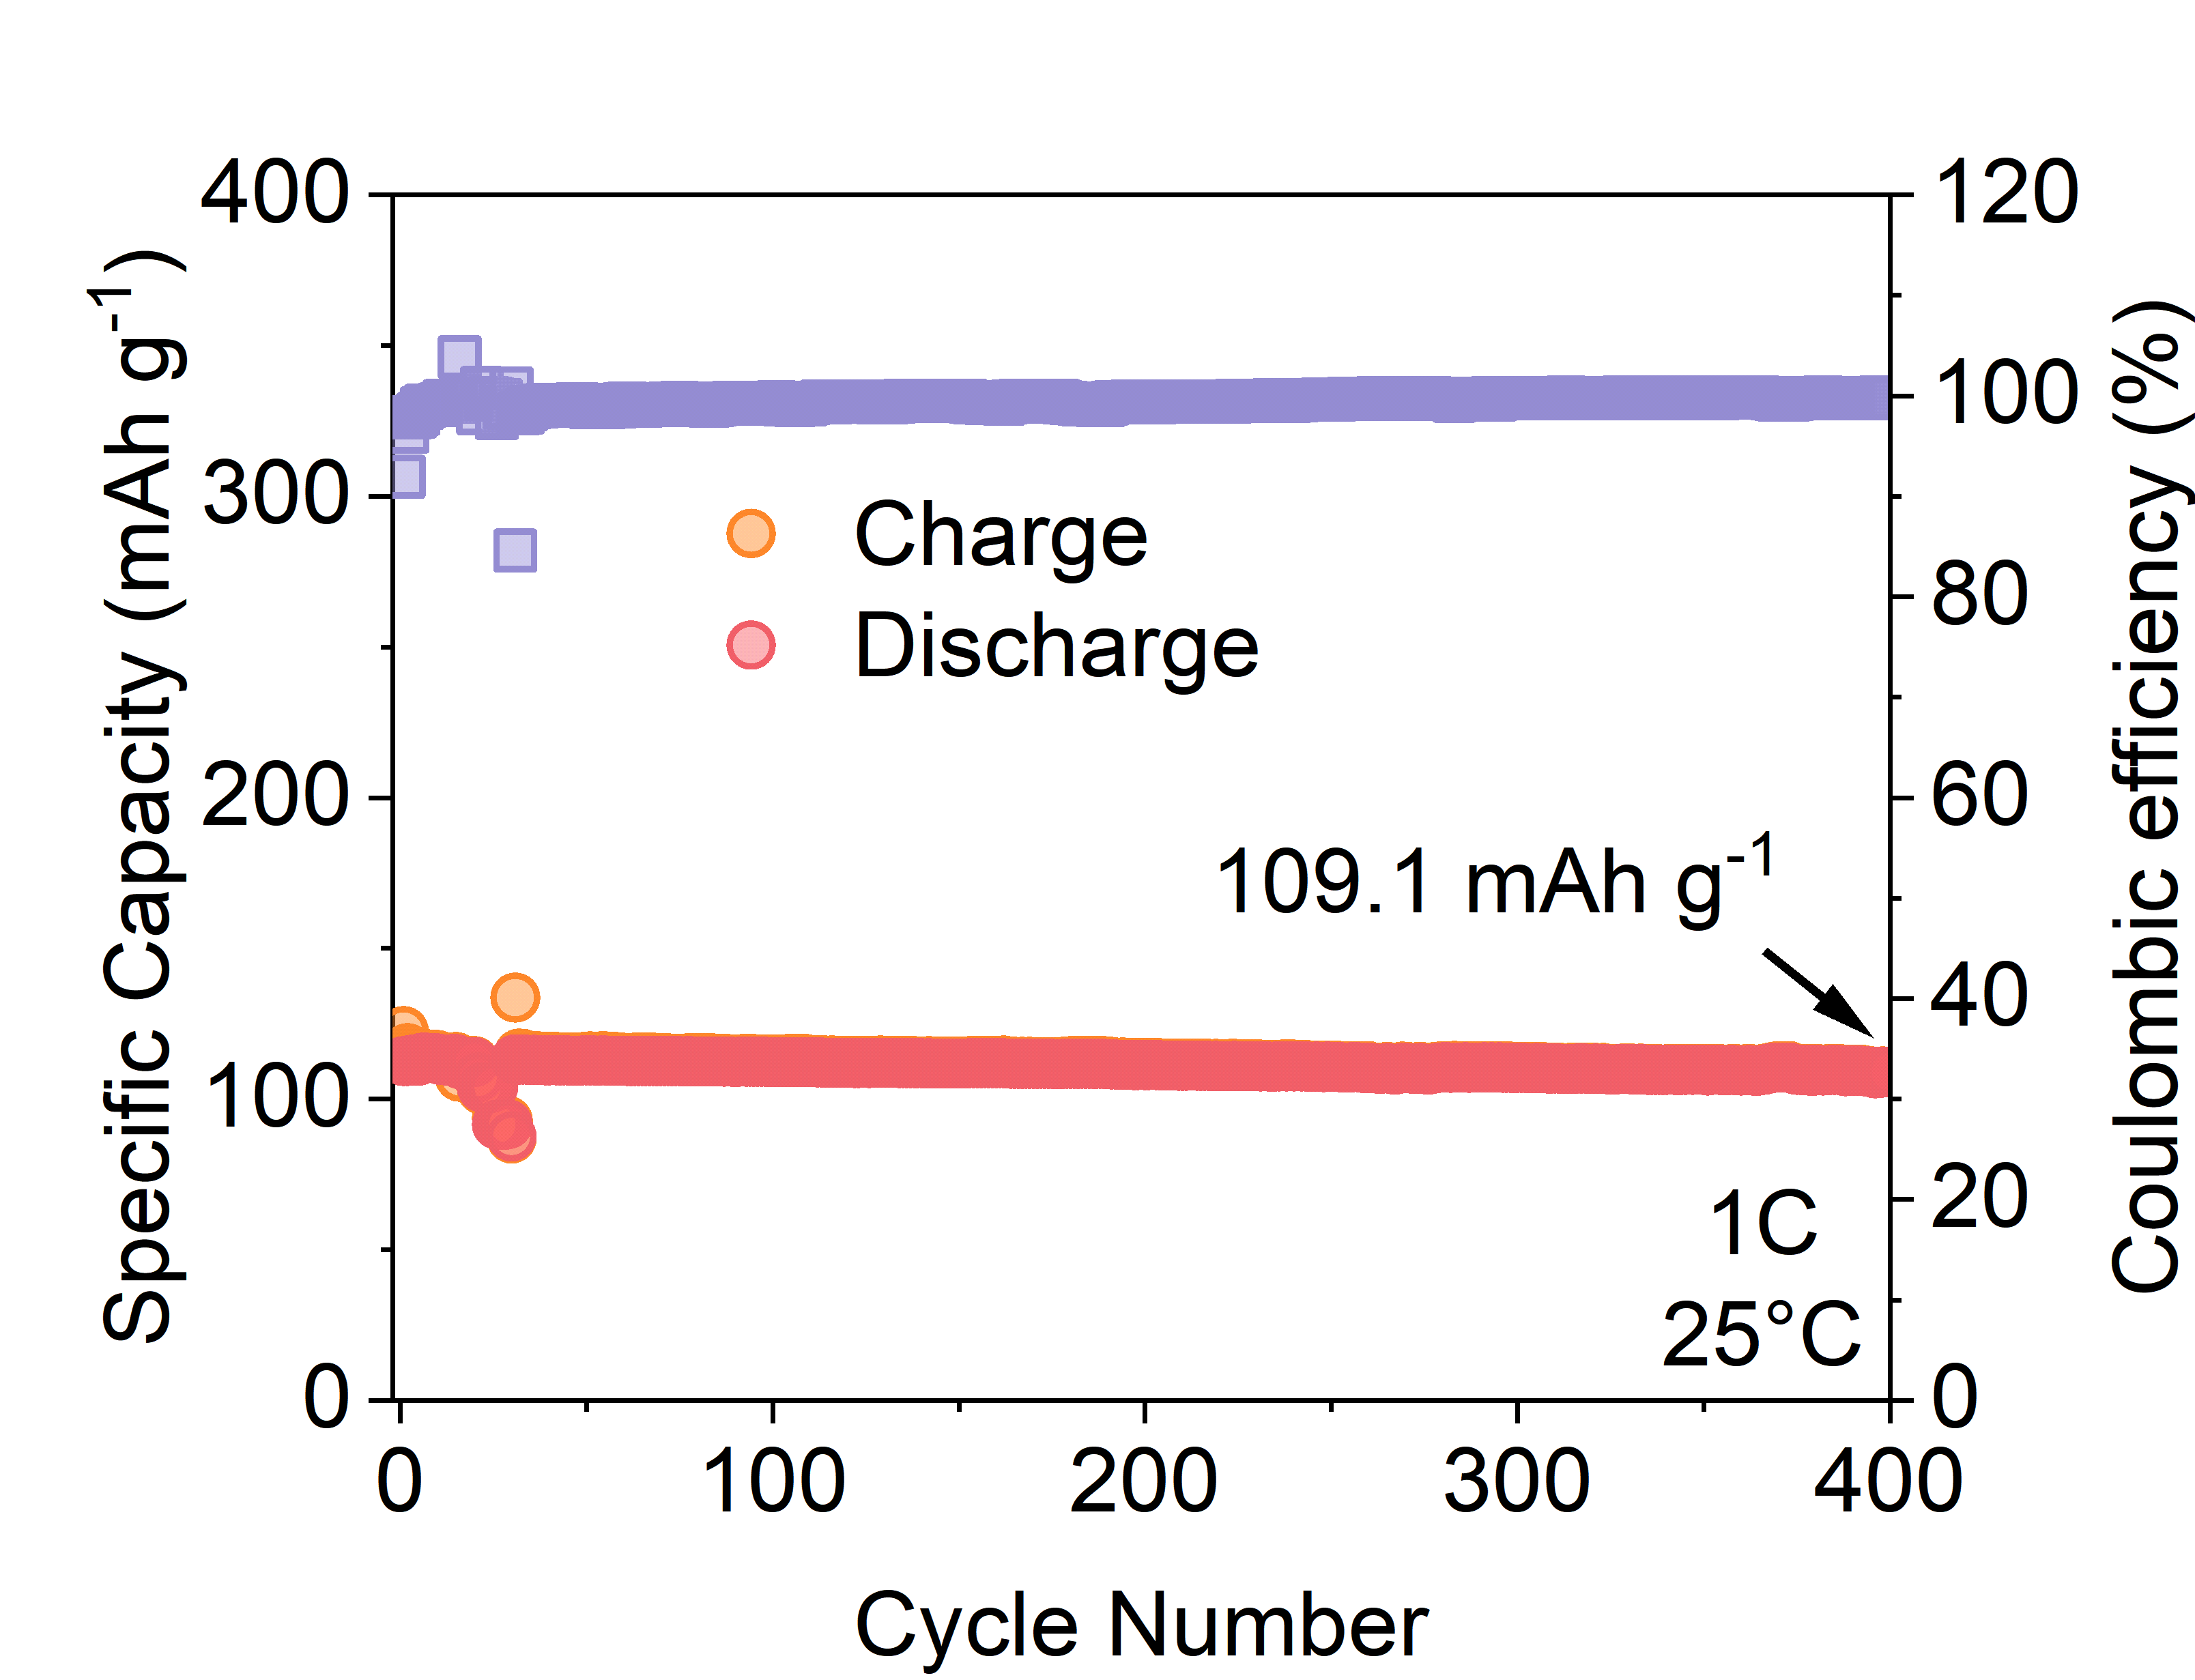


**Figure S22.** Cycling performance of all-solid-state batteries at 1 C@25 °C.


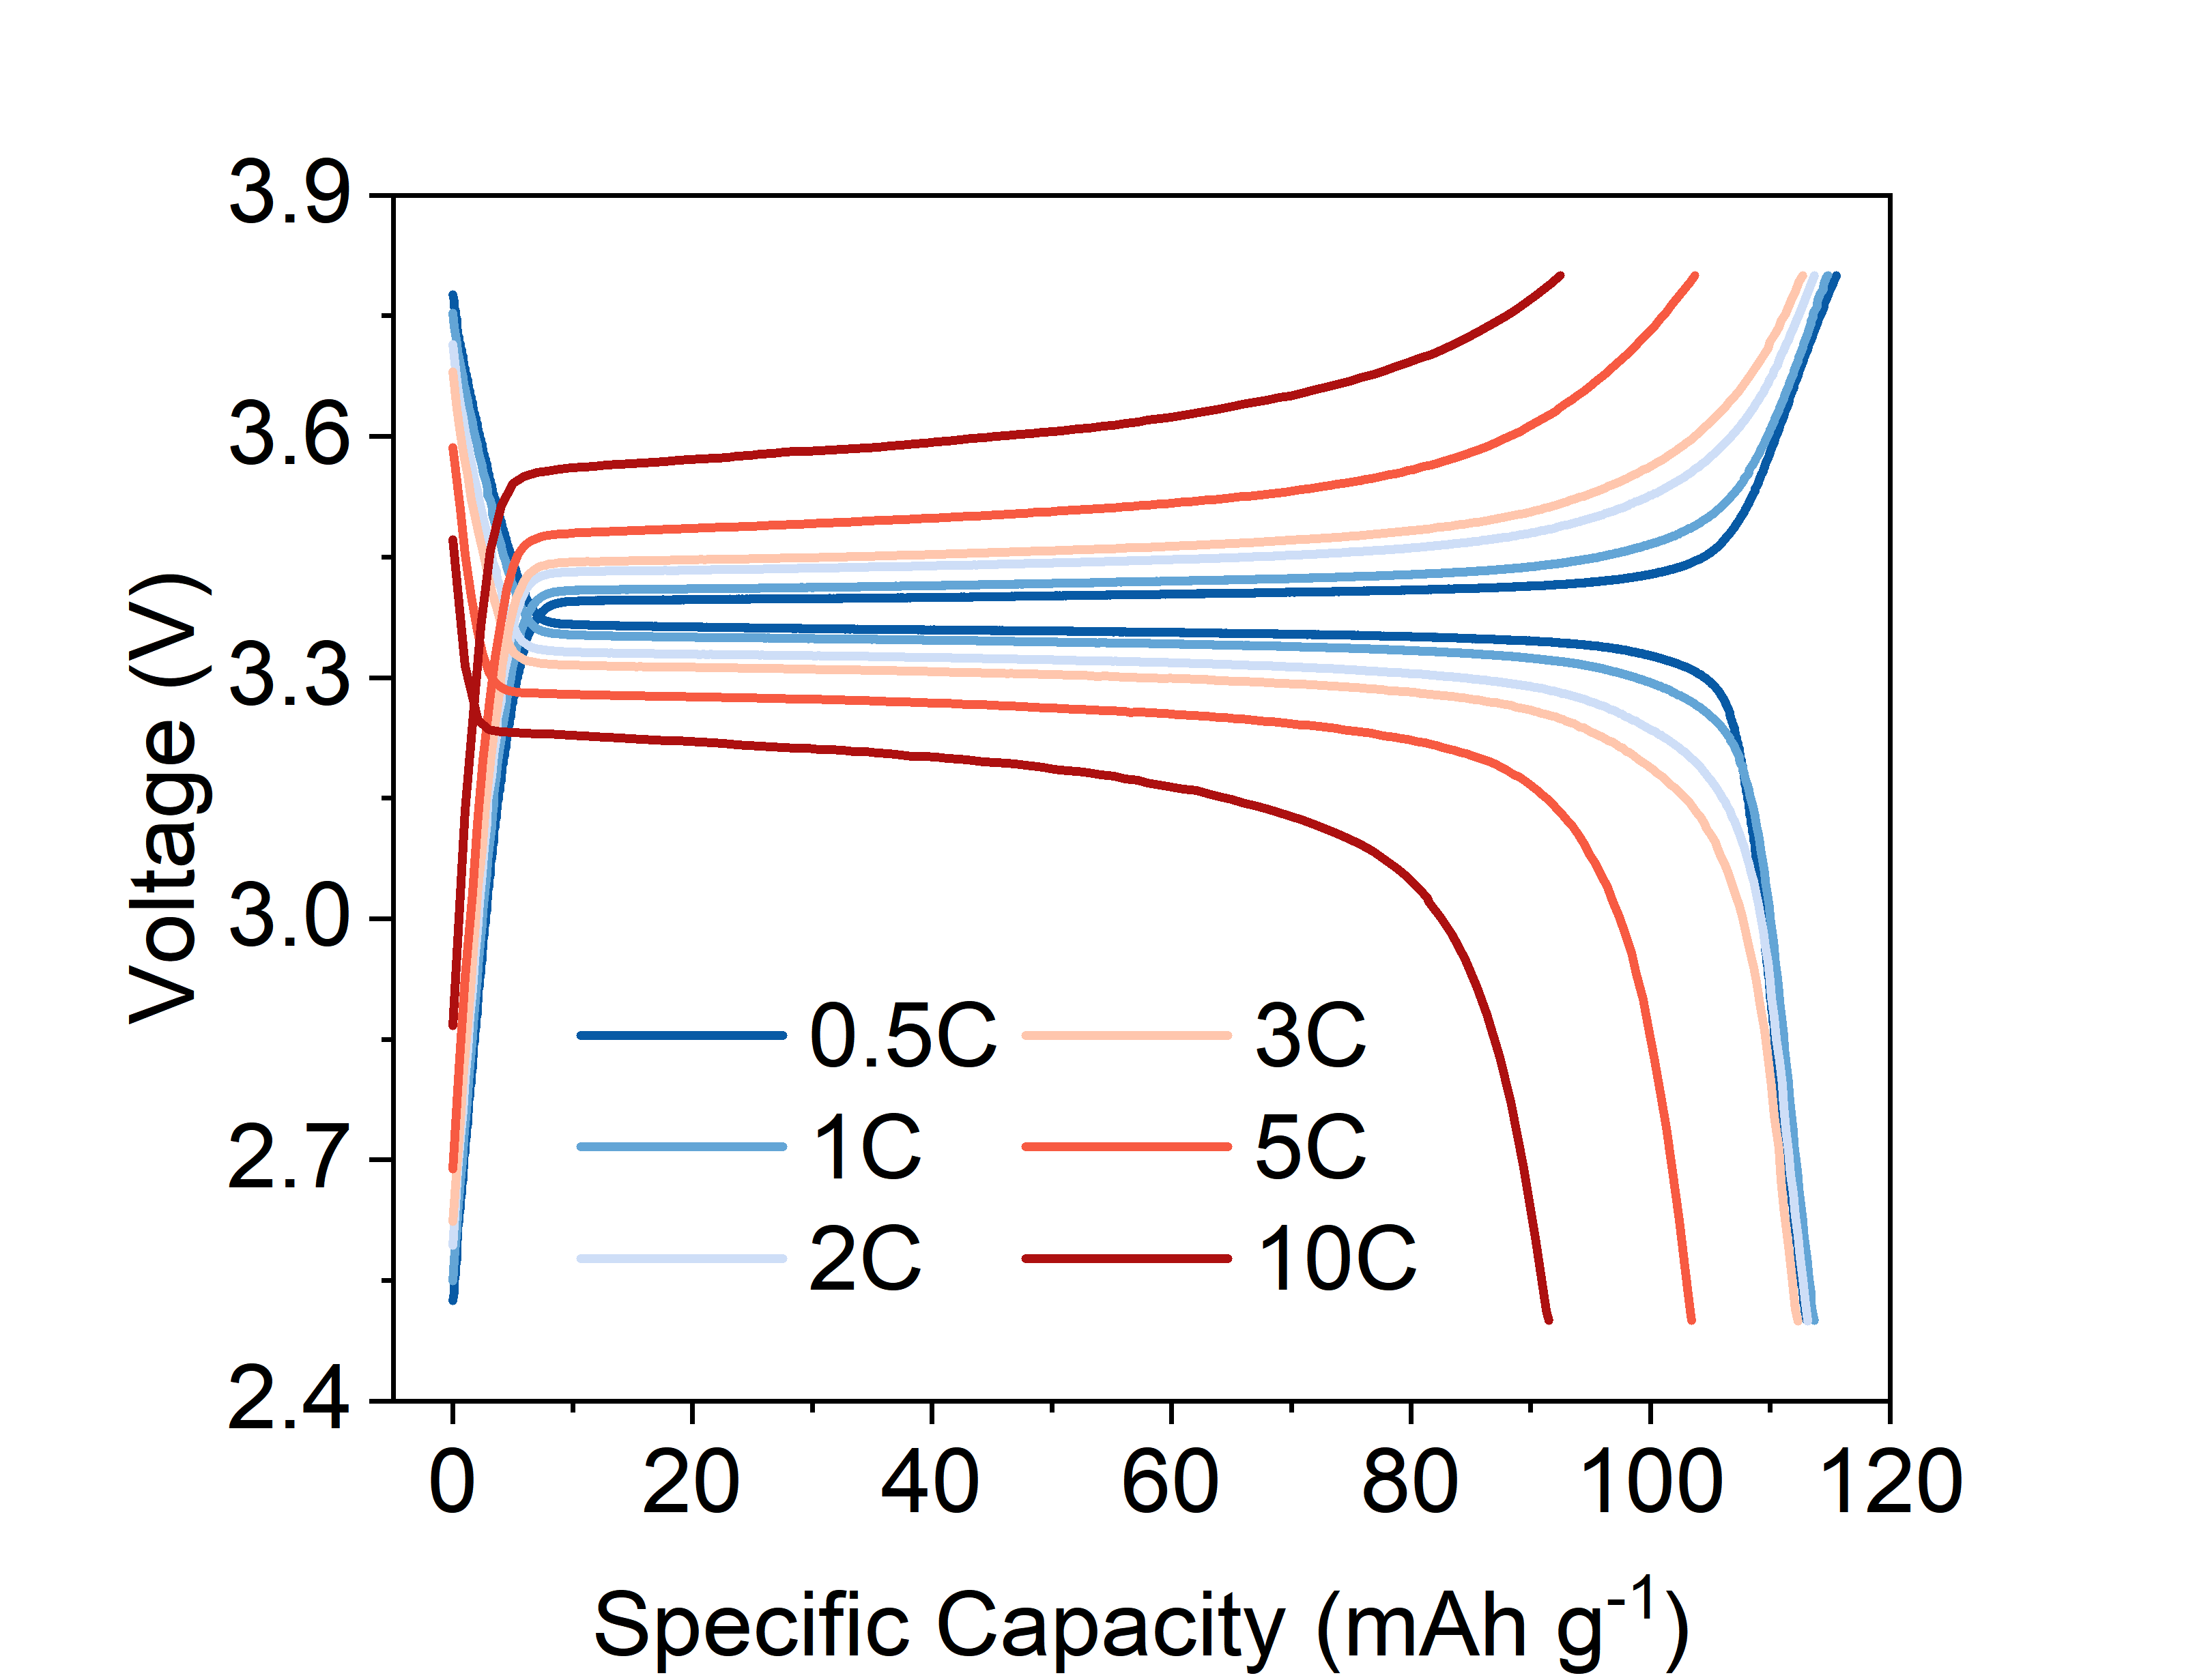


**Figure S23.** GCD curves at different current densities of Na|NZSP|CPTHF@NVP@Al all-solid-state battery.
